# Supplementary material for: Genome-wide analysis of 944 133 individuals provides insights into the etiology of haemorrhoidal disease
Source: HighWire-hosted journal article supplement (doi:10.1136/gutjnl-2020-323868), 2021-04-22
Supplement: gutjnl-2020-323868supp004_data_supplement.xlsx [file gutjnl-2020-323868supp004_data_supplement.xlsx]

## Sheet: Supplementary Table 4
Online Supplementary Table S4. Association of HEM risk variants with other traits and diseases.
Lead SNP (rsID)	Lead SNP BP	Proxy SNP (rsID)	Proxy SNP BP	r2	Associated trait	Domain	PheWAS database	Data source or PUBMEDID
rs145163454	1:169090748	-	-	-	Antithrombotic agents	Environmental	GWAS_ATLAS	31015401
rs145163454	1:169090748	rs2227246	1:169208179	1	Benign lipomatous neoplasm	-	Phenoscanner	UKBB
rs145163454	1:169090748	-	-	-	Blood clot in the leg	-	Phenoscanner	UKBB
rs145163454	1:169090748	-	-	-	Blood clot in the lung	-	Phenoscanner	UKBB
rs145163454	1:169090748	-	-	-	No blood clot, bronchitis, emphysema, asthma, rhinitis, eczema or allergy diagnosed by doctor	-	Phenoscanner	UKBB
rs145163454	1:169090748	rs2227246	1:169208179	1	Other soft tissue disorders	-	Phenoscanner	UKBB
rs145163454	1:169090748	-	-	-	Personal history of certain other diseases	Mortality	GWAS_ATLAS	31427789
rs145163454	1:169090748	rs2040445	1:169216412	0.91575	Personal history of medical treatment	Mortality	GWAS_ATLAS	31427789
rs145163454	1:169090748	-	-	-	Phlebitis and thrombophlebitis	-	Phenoscanner	UKBB
rs145163454	1:169090748	-	-	-	Pulmonary embolism	-	Phenoscanner	UKBB
rs145163454	1:169090748	-	-	-	Self-reported clotting disorder or excessive bleeding	-	Phenoscanner	UKBB
rs145163454	1:169090748	-	-	-	Self-reported deep venous thrombosis	-	Phenoscanner	UKBB
rs145163454	1:169090748	-	-	-	Self-reported hereditary or genetic haematological disorder	-	Phenoscanner	UKBB
rs145163454	1:169090748	-	-	-	Self-reported pulmonary embolism + or - dvt	-	Phenoscanner	UKBB
rs145163454	1:169090748	-	-	-	Treatment with warfarin	-	Phenoscanner	UKBB
rs145163454	1:169090748	-	-	-	venous thromboembolism	-	GWAS_catalog	31420334
rs145163454	1:169090748	rs2227246	1:169208179	1	Venous thrombosis	-	Phenoscanner	22675575
rs4951080	1:204533284	rs7556655	1:204493844	0.93755	Benign neoplasm of colon, rectum, anus and anal canal	Neoplasms	GWAS_ATLAS	31427789
rs4951080	1:204533284	rs2290854	1:204516025	0.93755	breast cancer in brca1 mutation carriers	-	GWAS_catalog	23544013
rs4951080	1:204533284	rs16853958	1:204528344	0.93318	diastolic blood pressure x alcohol consumption interaction (2df test)	-	GWAS_catalog	29912962
rs4951080	1:204533284	-	-	-	Forced vital capacity	-	Phenoscanner	UKBB
rs4951080	1:204533284	-	-	-	Forced vital capacity, best measure	-	Phenoscanner	UKBB
rs4951080	1:204533284	rs12139477	1:204553104	0.85018	FVC	Respiratory	GWAS_ATLAS	30804560
rs4951080	1:204533284	rs10494852	1:204457786	0.91995	Hair colour: Black	Dermatological	GWAS_ATLAS	31427789
rs4951080	1:204533284	rs10900594	1:204470129	0.933	Height	Skeletal	GWAS_ATLAS	30124842
rs4951080	1:204533284	rs10793765	1:204549375	0.95496	height	-	GWAS_catalog	30595370
rs4951080	1:204533284	rs11240751	1:204462050	0.9113	Relative age of first facial hair	Reproduction	GWAS_ATLAS	31427789
rs2605097	1:219642109	rs2605100	1:219644224	0.97226	adiposity	-	GWAS_catalog	19557161
rs2605097	1:219642109	-	-	-	Arm fat mass left	-	Phenoscanner	UKBB
rs2605097	1:219642109	-	-	-	Arm fat mass right	-	Phenoscanner	UKBB
rs2605097	1:219642109	-	-	-	Arm fat percentage left	-	Phenoscanner	UKBB
rs2605097	1:219642109	-	-	-	Arm fat percentage right	-	Phenoscanner	UKBB
rs2605097	1:219642109	-	-	-	Body fat percentage	-	Phenoscanner	UKBB
rs2605097	1:219642109	rs2605091	1:219640305	0.97686	Hip circumference	Metabolic	GWAS_ATLAS	23754948
rs2605097	1:219642109	-	-	-	Hip circumference	-	Phenoscanner	25673412
rs2605097	1:219642109	rs2605098	1:219643649	0.87565	hip circumference	-	GWAS_catalog	31453325
rs2605097	1:219642109	-	-	-	Hip circumference adjusted for BMI	-	Phenoscanner	25673412
rs2605097	1:219642109	rs748273	1:219650950	0.95848	hip circumference adjusted for bmi	-	GWAS_catalog	28552196
rs2605097	1:219642109	-	-	-	Hip circumference in females	-	Phenoscanner	25673412
rs2605097	1:219642109	rs2605098	1:219643649	0.87565	hip circumference variance	-	GWAS_catalog	31453325
rs2605097	1:219642109	rs2605091	1:219640305	0.97686	Impedance measures - Arm fat mass (left)	Metabolic	GWAS_ATLAS	31427789
rs2605097	1:219642109	rs2605091	1:219640305	0.97686	Impedance measures - Arm fat mass (right)	Metabolic	GWAS_ATLAS	31427789
rs2605097	1:219642109	rs2605091	1:219640305	0.97686	Impedance measures - Arm fat percentage (left)	Metabolic	GWAS_ATLAS	31427789
rs2605097	1:219642109	rs2605091	1:219640305	0.97686	Impedance measures - Arm fat percentage (right)	Metabolic	GWAS_ATLAS	31427789
rs2605097	1:219642109	rs2605091	1:219640305	0.97686	Impedance measures - Body fat percentage	Metabolic	GWAS_ATLAS	31427789
rs2605097	1:219642109	rs2605091	1:219640305	0.97686	Impedance measures - Impedance of arm (left)	Metabolic	GWAS_ATLAS	31427789
rs2605097	1:219642109	rs2605091	1:219640305	0.97686	Impedance measures - Impedance of arm (right)	Metabolic	GWAS_ATLAS	31427789
rs2605097	1:219642109	rs2605091	1:219640305	0.97686	Impedance measures - Impedance of whole body	Metabolic	GWAS_ATLAS	31427789
rs2605097	1:219642109	rs2605091	1:219640305	0.97686	Impedance measures - Leg fat mass (left)	Metabolic	GWAS_ATLAS	31427789
rs2605097	1:219642109	rs2605091	1:219640305	0.97686	Impedance measures - Leg fat mass (right)	Metabolic	GWAS_ATLAS	31427789
rs2605097	1:219642109	rs2605091	1:219640305	0.97686	Impedance measures - Leg fat percentage (left)	Metabolic	GWAS_ATLAS	31427789
rs2605097	1:219642109	rs2605091	1:219640305	0.97686	Impedance measures - Leg fat percentage (right)	Metabolic	GWAS_ATLAS	31427789
rs2605097	1:219642109	rs2605091	1:219640305	0.97686	Impedance measures - Trunk fat mass	Metabolic	GWAS_ATLAS	31427789
rs2605097	1:219642109	rs2605091	1:219640305	0.97686	Impedance measures - Trunk fat percentage	Metabolic	GWAS_ATLAS	31427789
rs2605097	1:219642109	rs2605091	1:219640305	0.97686	Impedance measures - Weight	Metabolic	GWAS_ATLAS	31427789
rs2605097	1:219642109	rs2605091	1:219640305	0.97686	Impedance measures - Whole body fat mass	Metabolic	GWAS_ATLAS	31427789
rs2605097	1:219642109	-	-	-	Impedance of arm left	-	Phenoscanner	UKBB
rs2605097	1:219642109	-	-	-	Impedance of arm right	-	Phenoscanner	UKBB
rs2605097	1:219642109	-	-	-	Impedance of whole body	-	Phenoscanner	UKBB
rs2605097	1:219642109	rs2605091	1:219640305	0.97686	Inguinal hernia	Gastrointestinal	GWAS_ATLAS	31427789
rs2605097	1:219642109	-	-	-	Leg fat mass left	-	Phenoscanner	UKBB
rs2605097	1:219642109	-	-	-	Leg fat mass right	-	Phenoscanner	UKBB
rs2605097	1:219642109	-	-	-	Leg fat percentage left	-	Phenoscanner	UKBB
rs2605097	1:219642109	-	-	-	Leg fat percentage right	-	Phenoscanner	UKBB
rs2605097	1:219642109	rs12036836	1:219626676	0.97255	Leg-lef fat ratio	Metabolic	GWAS_ATLAS	30664634
rs2605097	1:219642109	rs2820436	1:219640680	0.88026	osteoarthritis	-	GWAS_catalog	30664745
rs2605097	1:219642109	rs2820436	1:219640680	0.88026	osteoarthritis (hip)	-	GWAS_catalog	30374069
rs2605097	1:219642109	rs2820436	1:219640680	0.88026	osteoarthritis (hospital diagnosed)	-	GWAS_catalog	29559693
rs2605097	1:219642109	rs12036836	1:219626676	0.97255	Osteoarthritis of hip or knee	Skeletal	GWAS_ATLAS	30664745
rs2605097	1:219642109	rs2820436	1:219640680	0.88026	osteoarthritis of the hip (hospital diagnosed)	-	GWAS_catalog	29559693
rs2605097	1:219642109	rs2820436	1:219640680	0.88026	osteoarthritis of the hip or knee (hospital diagnosed)	-	GWAS_catalog	29559693
rs2605097	1:219642109	-	-	-	Trunk fat mass	-	Phenoscanner	UKBB
rs2605097	1:219642109	-	-	-	Trunk fat percentage	-	Phenoscanner	UKBB
rs2605097	1:219642109	rs12036836	1:219626676	0.97255	Trunk-trunk fat ratio	Metabolic	GWAS_ATLAS	30664634
rs2605097	1:219642109	rs2605091	1:219640305	0.97686	Type 2 Diabetes	Endocrine	GWAS_ATLAS	30297969
rs2605097	1:219642109	rs2820436	1:219640680	0.88026	Waist circumference	Metabolic	GWAS_ATLAS	25673412
rs2605097	1:219642109	-	-	-	Waist circumference adjusted for smoking in females	-	Phenoscanner	28443625
rs2605097	1:219642109	-	-	-	Waist hip ratio	-	Phenoscanner	20935629
rs2605097	1:219642109	-	-	-	Waist hip ratio adjusted for BMI	-	Phenoscanner	25673412
rs2605097	1:219642109	-	-	-	Waist hip ratio adjusted for BMI in females greater than 50 years of age	-	Phenoscanner	26426971
rs2605097	1:219642109	-	-	-	Waist hip ratio adjusted for BMI in females less than or equal to 50 years of age	-	Phenoscanner	26426971
rs2605097	1:219642109	-	-	-	Waist hip ratio adjusted for physical activity	-	Phenoscanner	28448500
rs2605097	1:219642109	-	-	-	Waist hip ratio adjusted for physical activity in females	-	Phenoscanner	28448500
rs2605097	1:219642109	-	-	-	Waist hip ratio adjusted for smoking	-	Phenoscanner	28443625
rs2605097	1:219642109	-	-	-	Waist hip ratio in female non-smokers	-	Phenoscanner	28443625
rs2605097	1:219642109	-	-	-	Waist hip ratio in females	-	Phenoscanner	25673412
rs2605097	1:219642109	-	-	-	Waist hip ratio in non-smokers	-	Phenoscanner	28443625
rs2605097	1:219642109	-	-	-	Waist hip ratio in physically active females	-	Phenoscanner	28448500
rs2605097	1:219642109	-	-	-	Waist hip ratio in physically active indivdiuals	-	Phenoscanner	28448500
rs2605097	1:219642109	rs2605091	1:219640305	0.97686	Waist-hip ratio	Metabolic	GWAS_ATLAS	20935629
rs2605097	1:219642109	rs1563355	1:219653101	0.8314	waist-hip ratio	-	GWAS_catalog	30239722
rs2605097	1:219642109	rs2605101	1:219644496	0.87636	waist-to-hip ratio adjusted for bmi	-	GWAS_catalog	26426971
rs2605097	1:219642109	rs2820436	1:219640680	0.88026	waist-to-hip ratio adjusted for bmi (joint analysis for main effect and physical activity interaction)	-	GWAS_catalog	28448500
rs2605097	1:219642109	rs2820436	1:219640680	0.88026	waist-to-hip ratio adjusted for bmi in active individuals	-	GWAS_catalog	28448500
rs2605097	1:219642109	rs2820436	1:219640680	0.88026	waist-to-hip ratio adjusted for bmi in inactive individuals	-	GWAS_catalog	28448500
rs2605097	1:219642109	rs2605101	1:219644496	0.87636	waist-to-hip ratio adjusted for bmi x sex interaction	-	GWAS_catalog	26426971
rs2605097	1:219642109	rs2605101	1:219644496	0.87636	waist-to-hip ratio adjusted for bmi x sex x age interaction (4df test)	-	GWAS_catalog	26426971
rs2605097	1:219642109	rs2820436	1:219640680	0.88026	waist-to-hip ratio adjusted for body mass index	-	GWAS_catalog	28448500
rs2605097	1:219642109	rs2605091	1:219640305	0.97686	Weight	Metabolic	GWAS_ATLAS	31427789
rs2605097	1:219642109	-	-	-	Whole body fat mass	-	Phenoscanner	UKBB
rs6723226	2:32849207	rs17428810	2:32736043	0.81635	cognitive performance	-	GWAS_catalog	30038396
rs6723226	2:32849207	rs17428810	2:32736043	0.81635	cognitive performance (mtag)	-	GWAS_catalog	30038396
rs6723226	2:32849207	rs17428810	2:32736043	0.81635	Height	Skeletal	GWAS_ATLAS	30124842
rs6723226	2:32849207	rs17428810	2:32736043	0.81635	Intelligence	Cognitive	GWAS_ATLAS	30038396
rs6723226	2:32849207	-	-	-	intelligence (mtag)	-	GWAS_catalog	29326435
rs6723226	2:32849207	-	-	-	Intelligence multi trait analysis	-	Phenoscanner	29326435
rs6723226	2:32849207	rs17428810	2:32736043	0.81635	Interleukin-18	Immunological	GWAS_ATLAS	27989323
rs6723226	2:32849207	rs17428810	2:32736043	0.81635	Sitting height	Skeletal	GWAS_ATLAS	31427789
rs6723226	2:32849207	-	-	-	Sitting height	-	Phenoscanner	UKBB
rs6723226	2:32849207	rs17428810	2:32736043	0.81635	Verbal-numerical reasoning	Cognitive	GWAS_ATLAS	29844566
rs4671051	2:63032696	rs360807	2:62926859	0.80246	Alcohol intake	Psychiatric	GWAS_ATLAS	30643251
rs4671051	2:63032696	rs360807	2:62926859	0.80246	First PC of the four riskly behaviours	Activities	GWAS_ATLAS	BioRxiv: https://doi.org/10.1101/261081
rs4671051	2:63032696	rs2080227	2:63081759	0.84175	HMG CoA reductase inhibitors	Environmental	GWAS_ATLAS	31015401
rs4671051	2:63032696	rs2710642	2:63149557	0.92589	ldl cholesterol	-	GWAS_catalog	24097068
rs4671051	2:63032696	rs360804	2:62939397	0.8073	ldl cholesterol levels	-	GWAS_catalog	30698716
rs4671051	2:63032696	rs360804	2:62939397	0.8073	ldl cholesterol levels in current drinkers	-	GWAS_catalog	30698716
rs4671051	2:63032696	rs360804	2:62939397	0.8073	ldl cholesterol levels x alcohol consumption (drinkers vs non-drinkers) interaction (2df)	-	GWAS_catalog	30698716
rs4671051	2:63032696	rs360804	2:62939397	0.8073	ldl cholesterol levels x alcohol consumption (regular vs non-regular drinkers) interaction (2df)	-	GWAS_catalog	30698716
rs4671051	2:63032696	rs2710642	2:63149557	0.92589	low density lipoprotein cholesterol levels	-	GWAS_catalog	29507422
rs4671051	2:63032696	rs2421816	2:63075033	0.95848	Low-density lipoprotein cholesterol	Metabolic	GWAS_ATLAS	24097068
rs4671051	2:63032696	rs2080227	2:63081759	0.84175	medication use (hmg coa reductase inhibitors)	-	GWAS_catalog	31015401
rs4671051	2:63032696	rs12713468	2:62983213	0.83348	Total cholesterol	Metabolic	GWAS_ATLAS	29403010
rs4671051	2:63032696	rs12713468	2:62983213	0.83348	total cholesterol levels	-	GWAS_catalog	29403010
rs34532102	2:64905182	rs34437502	2:64888426	0.9636	Monocyte percentage of white cells	Immunological	GWAS_ATLAS	27863252
rs34532102	2:64905182	-	-	-	Monocyte percentage of white cells	-	Phenoscanner	27863252
rs34532102	2:64905182	rs34437502	2:64888426	0.9636	Red cell distribution width	Immunological	GWAS_ATLAS	27863252
rs57116599	2:112770799	rs17174870	2:112665201	0.83448	multiple sclerosis	-	GWAS_catalog	21833088
rs7423637	2:145818064	rs2252654	2:145801113	0.95611	Bald Pattern 1	Dermatological	GWAS_ATLAS	31427789
rs7423637	2:145818064	rs34029033	2:145830328	0.84425	Bald Pattern 2	Dermatological	GWAS_ATLAS	31427789
rs7423637	2:145818064	rs2252654	2:145801113	0.95611	Baldness	Dermatological	GWAS_ATLAS	30573740
rs7423637	2:145818064	rs7604735	2:145839655	0.93356	coronary artery disease	-	GWAS_catalog	29212778
rs7423637	2:145818064	-	-	-	Coronary artery disease	-	Phenoscanner	29212778
rs7423637	2:145818064	-	-	-	Diastolic blood pressure	-	Phenoscanner	UKBB
rs7423637	2:145818064	rs2252654	2:145801113	0.95611	Educational attainment	Environment	GWAS_ATLAS	30038396
rs7423637	2:145818064	rs2252383	2:145803003	0.8569	educational attainment (years of education)	-	GWAS_catalog	30595370
rs7423637	2:145818064	rs2252654	2:145801113	0.95611	Family (paternal) history of Heart disease	Environment	GWAS_ATLAS	31427789
rs7423637	2:145818064	rs78809153	2:145805251	0.96902	Hair or balding pattern: pattern 4	-	Phenoscanner	UKBB
rs7423637	2:145818064	rs2252654	2:145801113	0.95611	Heel bone mineral density	Skeletal	GWAS_ATLAS	30598549
rs7423637	2:145818064	-	-	-	Mouth or teeth dental problems: dentures	-	Phenoscanner	UKBB
rs7423637	2:145818064	-	-	-	Peak expiratory flow	-	Phenoscanner	UKBB
rs7423637	2:145818064	rs2252383	2:145803003	0.8569	PEF	Respiratory	GWAS_ATLAS	30804560
rs7423637	2:145818064	-	-	-	Pulse wave arterial stiffness index	-	Phenoscanner	UKBB
rs7423637	2:145818064	-	-	-	Pulse wave peak to peak time	-	Phenoscanner	UKBB
rs7423637	2:145818064	rs12476923	2:145830053	0.84808	self-reported risk-taking behaviour	-	GWAS_catalog	30271922
rs7559714	2:148640768	rs12992412	2:148792665	0.81772	atrial fibrillation	-	GWAS_catalog	29892015
rs7559714	2:148640768	rs12992412	2:148792665	0.81772	Atrial Fibrillation	Cardiovascular	GWAS_ATLAS	29892015
rs7559714	2:148640768	rs13022319	2:148534374	0.93768	Basophil count	Immunological	GWAS_ATLAS	27863252
rs7559714	2:148640768	-	-	-	Basophil count	-	Phenoscanner	27863252
rs7559714	2:148640768	rs13022319	2:148534374	0.93768	Basophil percentage of granulocytes	Immunological	GWAS_ATLAS	27863252
rs7559714	2:148640768	-	-	-	Basophil percentage of granulocytes	-	Phenoscanner	27863252
rs7559714	2:148640768	rs13022319	2:148534374	0.93768	Basophil percentage of white cells	Immunological	GWAS_ATLAS	27863252
rs7559714	2:148640768	-	-	-	Basophil percentage of white cells	-	Phenoscanner	27863252
rs7559714	2:148640768	rs12990959	2:148572160	0.9336	diastolic blood pressure	-	GWAS_catalog	30224653
rs7559714	2:148640768	rs13026220	2:148586459	0.99549	estimated glomerular filtration rate	-	GWAS_catalog	30604766
rs7559714	2:148640768	rs13022319	2:148534374	0.93768	Estimated glomerular filtration rate	Metabolic	GWAS_ATLAS	31152163
rs7559714	2:148640768	rs4972270	2:148543331	0.92068	Estimated glomerular filtration rate based on serum creatinine	Metabolic	GWAS_ATLAS	26831199
rs7559714	2:148640768	rs4972356	2:148582309	0.98651	Neutrophil percentage of granulocytes	Immunological	GWAS_ATLAS	27863252
rs7559714	2:148640768	-	-	-	Neutrophil percentage of granulocytes	-	Phenoscanner	27863252
rs7559714	2:148640768	rs12105411	2:148800730	0.82823	red blood cell count	-	GWAS_catalog	30595370
rs7559714	2:148640768	rs1424949	2:148542963	0.92491	Serum Urate	Metabolic	GWAS_ATLAS	23263486
rs7559714	2:148640768	rs2307394	2:148716428	0.991	serum uric acid levels	-	GWAS_catalog	30993211
rs7559714	2:148640768	rs12464617	2:148576646	0.99551	Sum eosinophil basophil count	Immunological	GWAS_ATLAS	27863252
rs7559714	2:148640768	-	-	-	Sum eosinophil basophil counts	-	Phenoscanner	27863252
rs7559714	2:148640768	rs2307394	2:148716428	0.991	urate levels	-	GWAS_catalog	23263486
rs13017210	2:174008623	rs72905046	2:173948571	0.85705	household income (mtag)	-	GWAS_catalog	31844048
rs847148	2:176970456	-	-	-	Arm fat-free mass left	-	Phenoscanner	UKBB
rs847148	2:176970456	-	-	-	Arm fat-free mass right	-	Phenoscanner	UKBB
rs847148	2:176970456	-	-	-	Arm predicted mass left	-	Phenoscanner	UKBB
rs847148	2:176970456	-	-	-	Arm predicted mass right	-	Phenoscanner	UKBB
rs847148	2:176970456	rs847157	2:176962501	0.87872	Heel bone mineral density	Skeletal	GWAS_ATLAS	30048462
rs847148	2:176970456	-	-	-	Heel bone mineral density	-	Phenoscanner	UKBB
rs847148	2:176970456	rs847153	2:176962989	0.87872	Height	Skeletal	GWAS_ATLAS	30124842
rs847148	2:176970456	rs847157	2:176962501	0.87872	height	-	GWAS_catalog	30595370
rs847148	2:176970456	rs847157	2:176962501	0.87872	Impedance measures - Arm fat-free mass (left)	Metabolic	GWAS_ATLAS	31427789
rs847148	2:176970456	rs847157	2:176962501	0.87872	Impedance measures - Arm fat-free mass (right)	Metabolic	GWAS_ATLAS	31427789
rs847148	2:176970456	rs847157	2:176962501	0.87872	Impedance measures - Arm predicted mass (left)	Metabolic	GWAS_ATLAS	31427789
rs847148	2:176970456	rs847157	2:176962501	0.87872	Impedance measures - Arm predicted mass (right)	Metabolic	GWAS_ATLAS	31427789
rs847148	2:176970456	rs847157	2:176962501	0.87872	Impedance measures - Basal metabolic rate	Metabolic	GWAS_ATLAS	31427789
rs847148	2:176970456	rs847157	2:176962501	0.87872	Impedance measures - Impedance of arm (left)	Metabolic	GWAS_ATLAS	31427789
rs847148	2:176970456	rs847157	2:176962501	0.87872	Impedance measures - Impedance of arm (right)	Metabolic	GWAS_ATLAS	31427789
rs847148	2:176970456	rs711813	2:176966190	0.97111	Impedance measures - Impedance of whole body	Metabolic	GWAS_ATLAS	31427789
rs847148	2:176970456	rs847157	2:176962501	0.87872	Impedance measures - Trunk fat-free mass	Metabolic	GWAS_ATLAS	31427789
rs847148	2:176970456	rs847157	2:176962501	0.87872	Impedance measures - Trunk predicted mass	Metabolic	GWAS_ATLAS	31427789
rs847148	2:176970456	rs847157	2:176962501	0.87872	Impedance measures - Whole body fat-free mass	Metabolic	GWAS_ATLAS	31427789
rs847148	2:176970456	rs847157	2:176962501	0.87872	Impedance measures - Whole body water mass	Metabolic	GWAS_ATLAS	31427789
rs847148	2:176970456	-	-	-	Impedance of arm left	-	Phenoscanner	UKBB
rs847148	2:176970456	-	-	-	Impedance of arm right	-	Phenoscanner	UKBB
rs847148	2:176970456	rs741610	2:176969206	0.97585	Impedance of whole body	-	Phenoscanner	UKBB
rs847148	2:176970456	rs847157	2:176962501	0.87872	Sitting height	Skeletal	GWAS_ATLAS	31427789
rs847148	2:176970456	-	-	-	Trunk fat-free mass	-	Phenoscanner	UKBB
rs847148	2:176970456	-	-	-	Trunk predicted mass	-	Phenoscanner	UKBB
rs847148	2:176970456	-	-	-	Whole body fat-free mass	-	Phenoscanner	UKBB
rs847148	2:176970456	-	-	-	Whole body water mass	-	Phenoscanner	UKBB
rs34417560	2:191435716	rs4853718	2:191404964	0.99489	Use of sun/uv protection	Activities	GWAS_ATLAS	31427789
rs1689549	3:14837473	rs1687289	3:14829826	0.94441	Coronary artery disease	-	Phenoscanner	29212778
rs9847710	3:53062661	rs9831861	3:53088285	0.98774	colorectal cancer	-	GWAS_catalog	31089142
rs9847710	3:53062661	rs11715894	3:53040459	0.97162	disrupted circadian rhythm (low relative amplitude of rest-activity cycles)	-	GWAS_catalog	30120083
rs9847710	3:53062661	rs2581778	3:53055311	0.97162	Estimated glomerular filtration rate	Metabolic	GWAS_ATLAS	31152163
rs9847710	3:53062661	rs2581817	3:53071797	0.9959	gout	-	GWAS_catalog	31578528
rs9847710	3:53062661	rs13082026	3:52962681	0.80691	mental health study participation (completed survey)	-	GWAS_catalog	31263887
rs9847710	3:53062661	rs2581824	3:53022408	0.97162	Serum Urate	Metabolic	GWAS_ATLAS	23263486
rs9847710	3:53062661	-	-	-	Serum urate	-	Phenoscanner	23263486
rs9847710	3:53062661	rs6445559	3:53099466	0.99184	serum uric acid levels	-	GWAS_catalog	29403010
rs9847710	3:53062661	-	-	-	ulcerative colitis	-	GWAS_catalog	23128233
rs9847710	3:53062661	-	-	-	Ulcerative colitis	-	Phenoscanner	23128233
rs9847710	3:53062661	rs2244552	3:53055522	0.97162	urate levels	-	GWAS_catalog	31578528
rs9847710	3:53062661	rs2564931	3:53020559	0.97162	Uric acid	Metabolic	GWAS_ATLAS	29403010
rs2597301	3:70909494	rs2687201	3:70928930	0.89685	barrett's esophagus	-	GWAS_catalog	24121790
rs2597301	3:70909494	rs2687202	3:70929983	0.81315	barrett's esophagus or esophageal adenocarcinoma	-	GWAS_catalog	27527254
rs2597301	3:70909494	rs1522551	3:70902653	0.85326	Diaphragmatic hernia	Gastrointestinal	GWAS_ATLAS	31427789
rs2597301	3:70909494	rs2687201	3:70928930	0.89685	digestive system disease (barrett's esophagus and esophageal adenocarcinoma combined)	-	GWAS_catalog	24121790
rs2597301	3:70909494	rs2687201	3:70928930	0.89685	esophageal adenocarcinoma	-	GWAS_catalog	24121790
rs2597301	3:70909494	rs1522551	3:70902653	0.85326	FEV1/FVC ratio	Respiratory	GWAS_ATLAS	30804560
rs2597301	3:70909494	rs1522551	3:70902653	0.85326	First PC of the four riskly behaviours	Activities	GWAS_ATLAS	BioRxiv: https://doi.org/10.1101/261081
rs2597301	3:70909494	rs1522551	3:70902653	0.85326	Height	Skeletal	GWAS_ATLAS	30124842
rs2597301	3:70909494	rs13060374	3:70913882	0.84315	Impedance measures - Impedance of arm (left)	Metabolic	GWAS_ATLAS	31427789
rs2597301	3:70909494	rs2687195	3:70905581	0.83876	Impedance measures - Impedance of arm (right)	Metabolic	GWAS_ATLAS	31427789
rs2597301	3:70909494	rs17007949	3:70920041	0.88678	Impedance measures - Trunk fat mass	Metabolic	GWAS_ATLAS	31427789
rs2597301	3:70909494	rs1522551	3:70902653	0.85326	Impedance measures - Trunk fat percentage	Metabolic	GWAS_ATLAS	31427789
rs2597301	3:70909494	rs1522551	3:70902653	0.85326	Leg-lef fat ratio	Metabolic	GWAS_ATLAS	30664634
rs2597301	3:70909494	rs1522554	3:70913293	0.95472	lung function (fev1/fvc)	-	GWAS_catalog	30595370
rs2597301	3:70909494	rs11926363	3:70913181	0.90013	Number of sexual partners	Reproduction	GWAS_ATLAS	BioRxiv: https://doi.org/10.1101/261081
rs2597301	3:70909494	rs1522552	3:70907252	0.98149	Trunk fat mass	-	Phenoscanner	UKBB
rs2597301	3:70909494	-	-	-	Trunk fat percentage	-	Phenoscanner	UKBB
rs2597301	3:70909494	rs2597302	3:70917189	0.87411	Trunk-trunk fat ratio	Metabolic	GWAS_ATLAS	30664634
rs6792493	3:111477348	rs4284954	3:111468099	0.89195	lobe attachment (rater-scored or self-reported)	-	GWAS_catalog	29198719
rs9853475	3:114500255	rs9842905	3:114498351	0.98004	Height	Skeletal	GWAS_ATLAS	30124842
rs900400	3:156798775	-	-	-	adiponectin levels in pregnancy	-	GWAS_catalog	28317342
rs900400	3:156798775	-	-	-	Age at menarche	-	Phenoscanner	25231870
rs900400	3:156798775	rs4680338	3:156794425	0.91631	Age at menarche	Reproduction	GWAS_ATLAS	31427789
rs900400	3:156798775	rs17451107	3:156797609	0.95455	anthropometric traits in newborns	-	GWAS_catalog	23575227
rs900400	3:156798775	rs1482853	3:156798473	0.99582	Anthropometric traits in newborns	-	Phenoscanner	23575227
rs900400	3:156798775	rs13322435	3:156795468	0.9319	birth length (mtag)	-	GWAS_catalog	31681408
rs900400	3:156798775	-	-	-	Birth weight	-	Phenoscanner	20372150
rs900400	3:156798775	rs13322435	3:156795468	0.9319	birth weight	-	GWAS_catalog	31097437
rs900400	3:156798775	rs4680338	3:156794425	0.91631	Birth weight	Metabolic	GWAS_ATLAS	31427789
rs900400	3:156798775	rs13322435	3:156795468	0.9319	birth weight (mtag)	-	GWAS_catalog	31681408
rs900400	3:156798775	-	-	-	Birth weight and gestational age	-	Phenoscanner	23202124
rs900400	3:156798775	rs13322435	3:156795468	0.9319	birth weight variance	-	GWAS_catalog	31453325
rs900400	3:156798775	-	-	-	Birthweight	-	Phenoscanner	23202124
rs900400	3:156798775	rs900399	3:156798732	1	body fat percentage variance	-	GWAS_catalog	31453325
rs900400	3:156798775	rs4680338	3:156794425	0.91631	Bone mineral density	Skeletal	GWAS_ATLAS	28869591
rs900400	3:156798775	-	-	-	circulating leptin levels	-	GWAS_catalog	26833098
rs900400	3:156798775	-	-	-	circulating leptin levels	-	Phenoscanner	26833098
rs900400	3:156798775	-	-	-	circulating leptin levels adjusted for bmi	-	GWAS_catalog	26833098
rs900400	3:156798775	rs9817452	3:156795414	0.94636	hdl cholesterol	-	GWAS_catalog	30275531
rs900400	3:156798775	rs17451107	3:156797609	0.95455	hdl cholesterol levels in current drinkers	-	GWAS_catalog	30698716
rs900400	3:156798775	rs17451107	3:156797609	0.95455	hdl cholesterol levels x alcohol consumption (drinkers vs non-drinkers) interaction (2df)	-	GWAS_catalog	30698716
rs900400	3:156798775	rs17451107	3:156797609	0.95455	hdl cholesterol levels x alcohol consumption (regular vs non-regular drinkers) interaction (2df)	-	GWAS_catalog	30698716
rs900400	3:156798775	rs56082403	3:156797225	0.93962	heel bone mineral density	-	GWAS_catalog	28869591
rs900400	3:156798775	rs4680338	3:156794425	0.91631	Heel bone mineral density	Skeletal	GWAS_ATLAS	30048462
rs900400	3:156798775	-	-	-	Heel bone mineral density	-	Phenoscanner	UKBB
rs900400	3:156798775	-	-	-	Heel bone mineral density left	-	Phenoscanner	UKBB
rs900400	3:156798775	rs67261871	3:156797941	0.99582	Heel bone mineral density right	-	Phenoscanner	UKBB
rs900400	3:156798775	rs900399	3:156798732	1	high density lipoprotein cholesterol levels	-	GWAS_catalog	29083408
rs900400	3:156798775	rs13322435	3:156795468	0.9319	Impedance measures - Leg fat percentage (right)	Metabolic	GWAS_ATLAS	31427789
rs900400	3:156798775	rs13322435	3:156795468	0.9319	infant head circumference (mtag)	-	GWAS_catalog	31681408
rs900400	3:156798775	rs4680338	3:156794425	0.91631	mean corpuscular hemoglobin	-	GWAS_catalog	30595370
rs900400	3:156798775	rs13322435	3:156795468	0.9319	menarche (age at onset)	-	GWAS_catalog	30595370
rs900400	3:156798775	-	-	-	Menarche age at onset	-	Phenoscanner	25231870
rs900400	3:156798775	rs10049088	3:156797648	0.95868	metabolic syndrome	-	GWAS_catalog	31589552
rs900400	3:156798775	rs1482853	3:156798473	0.99582	Newborn birth weight gm	-	Phenoscanner	23575227
rs900400	3:156798775	-	-	-	Newborn fat mass	-	Phenoscanner	23575227
rs900400	3:156798775	-	-	-	Newborn sum of skinfolds sqrt mm	-	Phenoscanner	23575227
rs900400	3:156798775	rs1482852	3:156798294	0.9435	offspring birth weight	-	GWAS_catalog	31043758
rs900400	3:156798775	-	-	-	Ponderal index weightlength3	-	Phenoscanner	23202124
rs900400	3:156798775	-	-	-	Ponderal index z score	-	Phenoscanner	20372150
rs900400	3:156798775	rs13322435	3:156795468	0.9319	red blood cell count	-	GWAS_catalog	30595370
rs900400	3:156798775	rs10049088	3:156797648	0.95868	red cell distribution width	-	GWAS_catalog	30595370
rs900400	3:156798775	rs4680338	3:156794425	0.91631	Sitting height	Skeletal	GWAS_ATLAS	31427789
rs900400	3:156798775	-	-	-	Sitting height	-	Phenoscanner	UKBB
rs900400	3:156798775	rs900399	3:156798732	1	triglyceride levels	-	GWAS_catalog	29083408
rs900400	3:156798775	rs17451107	3:156797609	0.95455	triglyceride levels x alcohol consumption (drinkers vs non-drinkers) interaction (2df)	-	GWAS_catalog	30698716
rs900400	3:156798775	rs9817452	3:156795414	0.94636	triglycerides	-	GWAS_catalog	30275531
rs900400	3:156798775	rs4680338	3:156794425	0.91631	Waist circumference	Metabolic	GWAS_ATLAS	25673412
rs900400	3:156798775	-	-	-	Waist circumference	-	Phenoscanner	UKBB
rs900400	3:156798775	-	-	-	Waist circumference adjusted for BMI	-	Phenoscanner	25673412
rs900400	3:156798775	rs17451107	3:156797609	0.95455	waist circumference adjusted for bmi (adjusted for smoking behaviour)	-	GWAS_catalog	28443625
rs900400	3:156798775	rs17451107	3:156797609	0.95455	waist circumference adjusted for bmi (joint analysis main effects and physical activity interaction)	-	GWAS_catalog	28448500
rs900400	3:156798775	rs17451107	3:156797609	0.95455	waist circumference adjusted for bmi (joint analysis main effects and smoking interaction)	-	GWAS_catalog	28443625
rs900400	3:156798775	rs17451107	3:156797609	0.95455	waist circumference adjusted for bmi in active individuals	-	GWAS_catalog	28448500
rs900400	3:156798775	rs17451107	3:156797609	0.95455	waist circumference adjusted for body mass index	-	GWAS_catalog	25673412
rs900400	3:156798775	-	-	-	Waist circumference adjusted for physical activity	-	Phenoscanner	28448500
rs900400	3:156798775	-	-	-	Waist circumference adjusted for smoking	-	Phenoscanner	28443625
rs900400	3:156798775	-	-	-	Waist circumference adjusted for smoking in females	-	Phenoscanner	28443625
rs900400	3:156798775	rs900399	3:156798732	1	Waist circumference in female non-smokers	-	Phenoscanner	28443625
rs900400	3:156798775	-	-	-	Waist circumference in non-smokers	-	Phenoscanner	28443625
rs900400	3:156798775	rs900399	3:156798732	1	Waist circumference in physically active indivdiuals	-	Phenoscanner	28448500
rs900400	3:156798775	-	-	-	Waist hip ratio	-	Phenoscanner	25673412
rs900400	3:156798775	-	-	-	Waist hip ratio adjusted for BMI	-	Phenoscanner	25673412
rs900400	3:156798775	rs900399	3:156798732	1	Waist hip ratio adjusted for physical activity	-	Phenoscanner	28448500
rs900400	3:156798775	rs900399	3:156798732	1	Waist hip ratio adjusted for smoking	-	Phenoscanner	28443625
rs900400	3:156798775	rs900399	3:156798732	1	Waist hip ratio in physically active indivdiuals	-	Phenoscanner	28448500
rs900400	3:156798775	rs4680338	3:156794425	0.91631	Waist-hip ratio	Metabolic	GWAS_ATLAS	30239722
rs900400	3:156798775	rs17451107	3:156797609	0.95455	waist-hip ratio	-	GWAS_catalog	30575882
rs900400	3:156798775	rs17451107	3:156797609	0.95455	waist-to-hip ratio adjusted for bmi	-	GWAS_catalog	30575882
rs900400	3:156798775	rs17451107	3:156797609	0.95455	waist-to-hip ratio adjusted for bmi (adjusted for smoking behaviour)	-	GWAS_catalog	28443625
rs900400	3:156798775	rs17451107	3:156797609	0.95455	waist-to-hip ratio adjusted for bmi (joint analysis for main effect and physical activity interaction)	-	GWAS_catalog	28448500
rs900400	3:156798775	rs17451107	3:156797609	0.95455	waist-to-hip ratio adjusted for bmi in active individuals	-	GWAS_catalog	28448500
rs900400	3:156798775	rs1482852	3:156798294	0.9435	waist-to-hip ratio adjusted for bmi x sex x age interaction (4df test)	-	GWAS_catalog	26426971
rs900400	3:156798775	rs17451107	3:156797609	0.95455	waist-to-hip ratio adjusted for body mass index	-	GWAS_catalog	25673412
rs3851366	3:160191374	rs10513551	3:160086055	0.92593	ldl cholesterol	-	GWAS_catalog	30275531
rs3851366	3:160191374	rs56394279	3:160171092	0.98812	low density lipoprotein cholesterol levels	-	GWAS_catalog	29507422
rs3851366	3:160191374	rs56394279	3:160171092	0.98812	pulse pressure	-	GWAS_catalog	30578418
rs3851366	3:160191374	rs56394279	3:160171092	0.98812	systolic blood pressure	-	GWAS_catalog	30578418
rs3851366	3:160191374	rs56394279	3:160171092	0.98812	total cholesterol levels	-	GWAS_catalog	29507422
rs2687965	4:39491521	-	-	-	Height	Skeletal	GWAS_ATLAS	31427789
rs11942410	4:75656079	rs4585380	4:75673363	0.97405	chronic obstructive pulmonary disease	-	GWAS_catalog	30804561
rs11942410	4:75656079	rs35926103	4:75675706	0.97405	diverticular disease	-	GWAS_catalog	30177863
rs11942410	4:75656079	rs62316310	4:75676529	0.96875	fev1	-	GWAS_catalog	30804560
rs11942410	4:75656079	-	-	-	FEV1/FVC ratio	Respiratory	GWAS_ATLAS	30804560
rs11942410	4:75656079	-	-	-	FEV2	Respiratory	GWAS_ATLAS	30804560
rs11942410	4:75656079	rs11938276	4:75676256	0.96875	lung function (fev1/fvc)	-	GWAS_catalog	30595370
rs28663472	4:95948204	rs28676957	4:95903741	0.95668	Angina	Cardiovascular	GWAS_ATLAS	31427789
rs6839705	4:106144735	rs6533183	4:106133184	0.98277	birth weight	-	GWAS_catalog	31043758
rs6839705	4:106144735	rs1391441	4:106128760	0.82763	Birth weight	Metabolic	GWAS_ATLAS	31427789
rs6839705	4:106144735	-	-	-	Birth weight	-	Phenoscanner	UKBB
rs6839705	4:106144735	rs1391441	4:106128760	0.82763	Birth weight of first child	Metabolic	GWAS_ATLAS	31427789
rs6839705	4:106144735	-	-	-	Birth weight of first child	-	Phenoscanner	UKBB
rs6839705	4:106144735	rs7663401	4:106128954	0.95349	Cheese intake	Nutritional	GWAS_ATLAS	31427789
rs6839705	4:106144735	rs2047409	4:106137033	0.91744	chronic obstructive pulmonary disease	-	GWAS_catalog	30804561
rs6839705	4:106144735	rs2007403	4:106131210	0.91744	Coffee type: Ground coffee	Nutritional	GWAS_ATLAS	31427789
rs6839705	4:106144735	rs7674220	4:106148758	0.95373	cognitive ability, years of educational attainment or schizophrenia (pleiotropy)	-	GWAS_catalog	31374203
rs6839705	4:106144735	rs1391441	4:106128760	0.82763	colorectal cancer or advanced adenoma	-	GWAS_catalog	30510241
rs6839705	4:106144735	rs1391441	4:106128760	0.82763	Educational attainment	Environment	GWAS_ATLAS	31427789
rs6839705	4:106144735	-	-	-	educational attainment (years of education)	-	GWAS_catalog	27225129
rs6839705	4:106144735	-	-	-	Educational attainment years of education	-	Phenoscanner	27225129
rs6839705	4:106144735	rs6533183	4:106133184	0.98277	fev1	-	GWAS_catalog	30804560
rs6839705	4:106144735	rs1391441	4:106128760	0.82763	FEV1/FVC ratio	Respiratory	GWAS_ATLAS	30804560
rs6839705	4:106144735	rs1391441	4:106128760	0.82763	FEV2	Respiratory	GWAS_ATLAS	30804560
rs6839705	4:106144735	rs6533183	4:106133184	0.98277	First PC of the four riskly behaviours	Activities	GWAS_ATLAS	BioRxiv: https://doi.org/10.1101/261081
rs6839705	4:106144735	-	-	-	Fluid intelligence score	-	Phenoscanner	UKBB
rs6839705	4:106144735	-	-	-	Forced expiratory volume in 1-second	-	Phenoscanner	UKBB
rs6839705	4:106144735	-	-	-	Forced expiratory volume in 1-second, best measure	-	Phenoscanner	UKBB
rs6839705	4:106144735	-	-	-	Forced expiratory volume in 1-second, predicted percentage	-	Phenoscanner	UKBB
rs6839705	4:106144735	rs7663401	4:106128954	0.95349	Forced vital capacity, best measure	-	Phenoscanner	UKBB
rs6839705	4:106144735	rs1391438	4:106151843	0.84434	general cognitive ability	-	GWAS_catalog	29844566
rs6839705	4:106144735	rs1391438	4:106151843	0.84434	General risk tolerance	Activities	GWAS_ATLAS	BioRxiv: https://doi.org/10.1101/261081
rs6839705	4:106144735	-	-	-	general risk tolerance (mtag)	-	GWAS_catalog	30643258
rs6839705	4:106144735	rs7663401	4:106128954	0.95349	Granulocyte count	Immunological	GWAS_ATLAS	27863252
rs6839705	4:106144735	rs6533183	4:106133184	0.98277	Granulocyte count	-	Phenoscanner	27863252
rs6839705	4:106144735	rs1391441	4:106128760	0.82763	Heel bone mineral density	Skeletal	GWAS_ATLAS	30048462
rs6839705	4:106144735	rs1391441	4:106128760	0.82763	Height	Skeletal	GWAS_ATLAS	31427789
rs6839705	4:106144735	-	-	-	Height	-	Phenoscanner	UKBB
rs6839705	4:106144735	rs1391441	4:106128760	0.82763	household income (mtag)	-	GWAS_catalog	31844048
rs6839705	4:106144735	rs1391441	4:106128760	0.82763	Impedance measures - Trunk fat-free mass	Metabolic	GWAS_ATLAS	31427789
rs6839705	4:106144735	rs1391441	4:106128760	0.82763	Impedance measures - Trunk predicted mass	Metabolic	GWAS_ATLAS	31427789
rs6839705	4:106144735	rs1391438	4:106151843	0.84434	intelligence	-	GWAS_catalog	29942086
rs6839705	4:106144735	rs1391441	4:106128760	0.82763	Intelligence	Cognitive	GWAS_ATLAS	31427789
rs6839705	4:106144735	-	-	-	intelligence (mtag)	-	GWAS_catalog	29326435
rs6839705	4:106144735	-	-	-	Intelligence multi trait analysis	-	Phenoscanner	29326435
rs6839705	4:106144735	rs2007403	4:106131210	0.91744	lung function (fev1/fvc)	-	GWAS_catalog	30595370
rs6839705	4:106144735	rs2047409	4:106137033	0.91744	lung function in never smokers (low fev1 vs average fev1)	-	GWAS_catalog	26423011
rs6839705	4:106144735	rs2047409	4:106137033	0.91744	lung function in never smokers (low fev1 vs high fev1)	-	GWAS_catalog	26423011
rs6839705	4:106144735	rs1391441	4:106128760	0.82763	Lymphocyte count	Immunological	GWAS_ATLAS	27863252
rs6839705	4:106144735	rs1391441	4:106128760	0.82763	Lymphocyte percentage of white cells	Immunological	GWAS_ATLAS	27863252
rs6839705	4:106144735	-	-	-	Lymphocyte percentage of white cells	-	Phenoscanner	27863252
rs6839705	4:106144735	rs7663401	4:106128954	0.95349	Myeloid white cell count	Immunological	GWAS_ATLAS	27863252
rs6839705	4:106144735	rs7663401	4:106128954	0.95349	Myeloid white cell count	-	Phenoscanner	27863252
rs6839705	4:106144735	rs7663401	4:106128954	0.95349	Neutrophil count	Immunological	GWAS_ATLAS	27863252
rs6839705	4:106144735	rs6533183	4:106133184	0.98277	Neutrophil count	-	Phenoscanner	27863252
rs6839705	4:106144735	rs1391441	4:106128760	0.82763	Neutrophil percentage of white cells	Immunological	GWAS_ATLAS	27863252
rs6839705	4:106144735	-	-	-	Neutrophil percentage of white cells	-	Phenoscanner	27863252
rs6839705	4:106144735	rs1391441	4:106128760	0.82763	Number of sexual partners	Reproduction	GWAS_ATLAS	BioRxiv: https://doi.org/10.1101/261081
rs6839705	4:106144735	rs6533183	4:106133184	0.98277	peak expiratory flow	-	GWAS_catalog	30804560
rs6839705	4:106144735	rs1391441	4:106128760	0.82763	PEF	Respiratory	GWAS_ATLAS	30804560
rs6839705	4:106144735	-	-	-	Qualifications: college or university degree	-	Phenoscanner	UKBB
rs6839705	4:106144735	rs1391441	4:106128760	0.82763	Sitting height	Skeletal	GWAS_ATLAS	31427789
rs6839705	4:106144735	-	-	-	Sitting height	-	Phenoscanner	UKBB
rs6839705	4:106144735	rs7663401	4:106128954	0.95349	Sum basophil neutrophil count	Immunological	GWAS_ATLAS	27863252
rs6839705	4:106144735	rs6533183	4:106133184	0.98277	Sum basophil neutrophil counts	-	Phenoscanner	27863252
rs6839705	4:106144735	rs7663401	4:106128954	0.95349	Sum neutrophil eosinophil count	Immunological	GWAS_ATLAS	27863252
rs6839705	4:106144735	rs7663401	4:106128954	0.95349	Sum neutrophil eosinophil counts	-	Phenoscanner	27863252
rs6839705	4:106144735	rs1391439	4:106151642	0.93358	tonsillectomy	-	GWAS_catalog	28928442
rs6839705	4:106144735	rs6533183	4:106133184	0.98277	Trunk fat-free mass	-	Phenoscanner	UKBB
rs6839705	4:106144735	rs6533183	4:106133184	0.98277	Trunk predicted mass	-	Phenoscanner	UKBB
rs6839705	4:106144735	-	-	-	Years of educational attainment	-	Phenoscanner	27225129
rs6839705	4:106144735	-	-	-	Years of educational attainment in females	-	Phenoscanner	27225129
rs2060285	4:124746377	-	-	-	Bald Pattern 4	Dermatological	GWAS_ATLAS	31427789
rs2060285	4:124746377	-	-	-	Baldness	Dermatological	GWAS_ATLAS	30573740
rs2060285	4:124746377	-	-	-	FEV1/FVC ratio	Respiratory	GWAS_ATLAS	30804560
rs2060285	4:124746377	-	-	-	male-pattern baldness	-	GWAS_catalog	30573740
rs17824374	4:126924999	rs145365164	4:126954652	0.98266	chin dimples	-	GWAS_catalog	27182965
rs17824374	4:126924999	rs12509991	4:126996870	0.84098	response to homoharringtonine (cytotoxicity)	-	GWAS_catalog	25628645
rs1542726	4:145515769	-	-	-	Arm fat-free mass left	-	Phenoscanner	UKBB
rs1542726	4:145515769	-	-	-	Arm fat-free mass right	-	Phenoscanner	UKBB
rs1542726	4:145515769	-	-	-	Arm predicted mass left	-	Phenoscanner	UKBB
rs1542726	4:145515769	-	-	-	Arm predicted mass right	-	Phenoscanner	UKBB
rs1542726	4:145515769	-	-	-	Basal metabolic rate	-	Phenoscanner	UKBB
rs1542726	4:145515769	rs13116999	4:145442364	0.86555	fev1	-	GWAS_catalog	30804560
rs1542726	4:145515769	rs7681384	4:145437014	0.83657	FEV1/FCV	Respiratory	GWAS_ATLAS	26635072
rs1542726	4:145515769	rs7681384	4:145437014	0.83657	FEV1/FVC ratio	Respiratory	GWAS_ATLAS	30804560
rs1542726	4:145515769	rs7681384	4:145437014	0.83657	FEV2	Respiratory	GWAS_ATLAS	30804560
rs1542726	4:145515769	-	-	-	Forced expiratory volume in 1-second	-	Phenoscanner	UKBB
rs1542726	4:145515769	-	-	-	Forced expiratory volume in 1-second, best measure	-	Phenoscanner	UKBB
rs1542726	4:145515769	-	-	-	Forced expiratory volume in 1-second, predicted percentage	-	Phenoscanner	UKBB
rs1542726	4:145515769	-	-	-	Forced vital capacity	-	Phenoscanner	UKBB
rs1542726	4:145515769	-	-	-	Forced vital capacity, best measure	-	Phenoscanner	UKBB
rs1542726	4:145515769	rs7681384	4:145437014	0.83657	FVC	Respiratory	GWAS_ATLAS	30804560
rs1542726	4:145515769	rs7681384	4:145437014	0.83657	Height	Skeletal	GWAS_ATLAS	25282103
rs1542726	4:145515769	-	-	-	Height	-	Phenoscanner	25282103
rs1542726	4:145515769	rs7681384	4:145437014	0.83657	Hip circumference	Metabolic	GWAS_ATLAS	31427789
rs1542726	4:145515769	-	-	-	Hip circumference	-	Phenoscanner	UKBB
rs1542726	4:145515769	rs7681384	4:145437014	0.83657	Impedance measures - Arm fat-free mass (left)	Metabolic	GWAS_ATLAS	31427789
rs1542726	4:145515769	rs7681384	4:145437014	0.83657	Impedance measures - Arm fat-free mass (right)	Metabolic	GWAS_ATLAS	31427789
rs1542726	4:145515769	rs7681384	4:145437014	0.83657	Impedance measures - Arm predicted mass (left)	Metabolic	GWAS_ATLAS	31427789
rs1542726	4:145515769	rs7681384	4:145437014	0.83657	Impedance measures - Arm predicted mass (right)	Metabolic	GWAS_ATLAS	31427789
rs1542726	4:145515769	rs7681384	4:145437014	0.83657	Impedance measures - Basal metabolic rate	Metabolic	GWAS_ATLAS	31427789
rs1542726	4:145515769	rs7681384	4:145437014	0.83657	Impedance measures - Impedance of whole body	Metabolic	GWAS_ATLAS	31427789
rs1542726	4:145515769	rs7681384	4:145437014	0.83657	Impedance measures - Leg fat-free mass (left)	Metabolic	GWAS_ATLAS	31427789
rs1542726	4:145515769	rs7681384	4:145437014	0.83657	Impedance measures - Leg fat-free mass (right)	Metabolic	GWAS_ATLAS	31427789
rs1542726	4:145515769	rs7681384	4:145437014	0.83657	Impedance measures - Leg predicted mass (left)	Metabolic	GWAS_ATLAS	31427789
rs1542726	4:145515769	rs7681384	4:145437014	0.83657	Impedance measures - Leg predicted mass (right)	Metabolic	GWAS_ATLAS	31427789
rs1542726	4:145515769	rs7681384	4:145437014	0.83657	Impedance measures - Trunk fat-free mass	Metabolic	GWAS_ATLAS	31427789
rs1542726	4:145515769	rs7681384	4:145437014	0.83657	Impedance measures - Trunk predicted mass	Metabolic	GWAS_ATLAS	31427789
rs1542726	4:145515769	rs7681384	4:145437014	0.83657	Impedance measures - Weight	Metabolic	GWAS_ATLAS	31427789
rs1542726	4:145515769	rs7681384	4:145437014	0.83657	Impedance measures - Whole body fat-free mass	Metabolic	GWAS_ATLAS	31427789
rs1542726	4:145515769	rs7681384	4:145437014	0.83657	Impedance measures - Whole body water mass	Metabolic	GWAS_ATLAS	31427789
rs1542726	4:145515769	-	-	-	Leg fat-free mass left	-	Phenoscanner	UKBB
rs1542726	4:145515769	-	-	-	Leg fat-free mass right	-	Phenoscanner	UKBB
rs1542726	4:145515769	-	-	-	Leg predicted mass left	-	Phenoscanner	UKBB
rs1542726	4:145515769	-	-	-	Leg predicted mass right	-	Phenoscanner	UKBB
rs1542726	4:145515769	rs13116999	4:145442364	0.86555	lung function (fev1/fvc)	-	GWAS_catalog	30804560
rs1542726	4:145515769	rs13116999	4:145442364	0.86555	lung function (fvc)	-	GWAS_catalog	30804560
rs1542726	4:145515769	rs6828982	4:145470604	0.93633	lung function (low fev1 vs high fev1)	-	GWAS_catalog	26423011
rs1542726	4:145515769	rs13107665	4:145472644	0.93633	lung function in never smokers (low fev1 vs high fev1)	-	GWAS_catalog	26423011
rs1542726	4:145515769	rs13116999	4:145442364	0.86555	peak expiratory flow	-	GWAS_catalog	30804560
rs1542726	4:145515769	-	-	-	Peak expiratory flow	-	Phenoscanner	UKBB
rs1542726	4:145515769	rs7681384	4:145437014	0.83657	PEF	Respiratory	GWAS_ATLAS	30804560
rs1542726	4:145515769	rs7681384	4:145437014	0.83657	post bronchodilator fev1	-	GWAS_catalog	26634245
rs1542726	4:145515769	rs6537298	4:145506871	0.97974	Post bronchodilator FEV1	-	Phenoscanner	26634245
rs1542726	4:145515769	rs7681384	4:145437014	0.83657	post bronchodilator fev1/fvc ratio	-	GWAS_catalog	26634245
rs1542726	4:145515769	-	-	-	Post bronchodilator FEV1FVC ratio	-	Phenoscanner	26634245
rs1542726	4:145515769	rs11407396	4:145516737	0.89115	Right fusiform	Neurological	GWAS_ATLAS	31676860
rs1542726	4:145515769	rs7681384	4:145437014	0.83657	Sitting height	Skeletal	GWAS_ATLAS	31427789
rs1542726	4:145515769	-	-	-	Sitting height	-	Phenoscanner	UKBB
rs1542726	4:145515769	-	-	-	Trunk fat-free mass	-	Phenoscanner	UKBB
rs1542726	4:145515769	-	-	-	Trunk predicted mass	-	Phenoscanner	UKBB
rs1542726	4:145515769	rs7681384	4:145437014	0.83657	Waist-hip ratio	Metabolic	GWAS_ATLAS	30239722
rs1542726	4:145515769	rs7681384	4:145437014	0.83657	Weight	Metabolic	GWAS_ATLAS	31427789
rs1542726	4:145515769	rs6537297	4:145502029	0.95588	Weight	-	Phenoscanner	UKBB
rs1542726	4:145515769	-	-	-	Whole body fat-free mass	-	Phenoscanner	UKBB
rs1542726	4:145515769	-	-	-	Whole body water mass	-	Phenoscanner	UKBB
rs72707023	5:667620	rs77015126	5:670909	0.91453	Estimated glomerular filtration rate	Metabolic	GWAS_ATLAS	31152163
rs72707023	5:667620	rs11739847	5:609661	0.92974	fev1	-	GWAS_catalog	30804560
rs72707023	5:667620	rs72704802	5:554211	0.88831	FEV1/FVC ratio	Respiratory	GWAS_ATLAS	30804560
rs72707023	5:667620	rs72704791	5:547896	0.84302	FEV2	Respiratory	GWAS_ATLAS	30804560
rs72707023	5:667620	rs11739847	5:609661	0.92974	lung function (fev1/fvc)	-	GWAS_catalog	30804560
rs72707023	5:667620	rs11739847	5:609661	0.92974	lung function (fvc)	-	GWAS_catalog	30804560
rs72707023	5:667620	-	-	-	Potassium in urine	-	Phenoscanner	UKBB
rs72707023	5:667620	rs74553517	5:665671	0.92373	reaction time	-	GWAS_catalog	29844566
rs72707023	5:667620	rs4957048	5:583442	0.84852	ulcerative colitis	-	GWAS_catalog	20228799
rs72707023	5:667620	rs72704791	5:547896	0.84302	Ulcerative colitis	Gastrointestinal	GWAS_ATLAS	28067908
rs61026653	5:15757570	rs13170409	5:15764650	0.98293	Systemic Lupus Erythematosus	Skeletal	GWAS_ATLAS	29848360
rs62368263	5:50726027	rs62368272	5:50754547	0.84975	brain region volumes	-	GWAS_catalog	31676860
rs62368263	5:50726027	rs113474156	5:50658924	0.94156	Heel bone mineral density	Skeletal	GWAS_ATLAS	30048462
rs62368263	5:50726027	rs62366930	5:50699314	0.85796	Left putamen	Neurological	GWAS_ATLAS	31676860
rs4485884	5:51108645	-	-	-	Body fat percentage	-	Phenoscanner	UKBB
rs4485884	5:51108645	-	-	-	PEF	Respiratory	GWAS_ATLAS	30804560
rs4485884	5:51108645	-	-	-	Trunk fat percentage	-	Phenoscanner	UKBB
rs6867042	5:93555761	rs17376456	5:93557702	0.9915	diabetic retinopathy	-	GWAS_catalog	21310492
rs6867042	5:93555761	rs9314093	5:93333347	0.83962	Hearing difficulty/problems	Ear, Nose, Throat	GWAS_ATLAS	31427789
rs4959352	6:624922	rs4960127	6:624892	0.95119	Hair colour: Black	Dermatological	GWAS_ATLAS	31427789
rs722587	6:1775714	rs3778519	6:1771512	0.92708	FEV1/FVC ratio	Respiratory	GWAS_ATLAS	30804560
rs722587	6:1775714	rs3778519	6:1771512	0.92708	FEV2	Respiratory	GWAS_ATLAS	30804560
rs722587	6:1775714	rs3778519	6:1771512	0.92708	height	-	GWAS_catalog	30595370
rs722587	6:1775714	rs3778519	6:1771512	0.92708	Height	Skeletal	GWAS_ATLAS	31427789
rs722587	6:1775714	-	-	-	Height	-	Phenoscanner	UKBB
rs722587	6:1775714	rs722585	6:1775863	1	Hip circumference	Metabolic	GWAS_ATLAS	25673412
rs722587	6:1775714	rs722585	6:1775863	1	hip circumference adjusted for bmi	-	GWAS_catalog	25673412
rs722587	6:1775714	rs722585	6:1775863	1	intraocular pressure	-	GWAS_catalog	31959993
rs722587	6:1775714	rs3778519	6:1771512	0.92708	lung function (fev1/fvc)	-	GWAS_catalog	30595370
rs722587	6:1775714	-	-	-	Peak expiratory flow	-	Phenoscanner	UKBB
rs722587	6:1775714	rs3778519	6:1771512	0.92708	PEF	Respiratory	GWAS_ATLAS	30804560
rs1156533	6:30065149	rs9280888	6:30064849	1	Age-related Macular Degeneration	Ophthalmological	GWAS_ATLAS	26691988
rs1156533	6:30065149	-	-	-	Age-related macular degeneration	-	Phenoscanner	26691988
rs1156533	6:30065149	rs916570	6:30066031	0.80425	Celiac disease	Gastrointestinal	GWAS_ATLAS	22057235
rs1156533	6:30065149	-	-	-	Comparative body size at age 10	-	Phenoscanner	UKBB
rs1156533	6:30065149	rs9280888	6:30064849	1	Eosinophil count	Immunological	GWAS_ATLAS	27863252
rs1156533	6:30065149	-	-	-	Eosinophil count	-	Phenoscanner	27863252
rs1156533	6:30065149	rs916570	6:30066031	0.80425	eosinophil counts	-	GWAS_catalog	31272903
rs1156533	6:30065149	rs9280888	6:30064849	1	Eosinophil percentage of granulocytes	Immunological	GWAS_ATLAS	27863252
rs1156533	6:30065149	-	-	-	Eosinophil percentage of granulocytes	-	Phenoscanner	27863252
rs1156533	6:30065149	rs9280888	6:30064849	1	Eosinophil percentage of white cells	Immunological	GWAS_ATLAS	27863252
rs1156533	6:30065149	-	-	-	Eosinophil percentage of white cells	-	Phenoscanner	27863252
rs1156533	6:30065149	-	-	-	FEV1/FVC ratio	Respiratory	GWAS_ATLAS	30804560
rs1156533	6:30065149	-	-	-	FEV2	Respiratory	GWAS_ATLAS	30804560
rs1156533	6:30065149	-	-	-	Forced expiratory volume in 1-second, predicted percentage	-	Phenoscanner	UKBB
rs1156533	6:30065149	-	-	-	FVC	Respiratory	GWAS_ATLAS	30804560
rs1156533	6:30065149	rs9280888	6:30064849	1	Granulocyte count	Immunological	GWAS_ATLAS	27863252
rs1156533	6:30065149	-	-	-	Granulocyte count	-	Phenoscanner	27863252
rs1156533	6:30065149	rs916570	6:30066031	0.80425	Heel bone mineral density	Skeletal	GWAS_ATLAS	30598549
rs1156533	6:30065149	rs916570	6:30066031	0.80425	Hematocrit	Immunological	GWAS_ATLAS	27863252
rs1156533	6:30065149	rs9280888	6:30064849	1	Hemoglobin concentration	Immunological	GWAS_ATLAS	27863252
rs1156533	6:30065149	rs916570	6:30066031	0.80425	Hemoglobin concentration	-	Phenoscanner	27863252
rs1156533	6:30065149	rs916570	6:30066031	0.80425	Hip circumference	-	Phenoscanner	UKBB
rs1156533	6:30065149	rs916570	6:30066031	0.80425	Idiopathic membranous nephropathy	-	Phenoscanner	21323541
rs1156533	6:30065149	-	-	-	IgA deficiency	-	Phenoscanner	27723758
rs1156533	6:30065149	rs9280888	6:30064849	1	Immunoglobulin A deficiency	Immunological	GWAS_ATLAS	27723758
rs1156533	6:30065149	-	-	-	Intestinal malabsorption	-	Phenoscanner	UKBB
rs1156533	6:30065149	rs916570	6:30066031	0.80425	Leg fat mass left	-	Phenoscanner	UKBB
rs1156533	6:30065149	rs916570	6:30066031	0.80425	Leg fat mass right	-	Phenoscanner	UKBB
rs1156533	6:30065149	rs9280888	6:30064849	1	Lymphocyte count	Immunological	GWAS_ATLAS	27863252
rs1156533	6:30065149	-	-	-	Lymphocyte count	-	Phenoscanner	27863252
rs1156533	6:30065149	rs9280888	6:30064849	1	Monocyte count	Immunological	GWAS_ATLAS	27863252
rs1156533	6:30065149	-	-	-	Monocyte count	-	Phenoscanner	27863252
rs1156533	6:30065149	-	-	-	Mouth or teeth dental problems: dentures	-	Phenoscanner	UKBB
rs1156533	6:30065149	rs9280888	6:30064849	1	Myeloid white cell count	Immunological	GWAS_ATLAS	27863252
rs1156533	6:30065149	-	-	-	Myeloid white cell count	-	Phenoscanner	27863252
rs1156533	6:30065149	rs9280888	6:30064849	1	Neutrophil count	Immunological	GWAS_ATLAS	27863252
rs1156533	6:30065149	-	-	-	Neutrophil count	-	Phenoscanner	27863252
rs1156533	6:30065149	rs9280888	6:30064849	1	Neutrophil percentage of granulocytes	Immunological	GWAS_ATLAS	27863252
rs1156533	6:30065149	-	-	-	Neutrophil percentage of granulocytes	-	Phenoscanner	27863252
rs1156533	6:30065149	-	-	-	Peak expiratory flow	-	Phenoscanner	UKBB
rs1156533	6:30065149	-	-	-	PEF	Respiratory	GWAS_ATLAS	30804560
rs1156533	6:30065149	-	-	-	Plateletcrit	Immunological	GWAS_ATLAS	27863252
rs1156533	6:30065149	-	-	-	Plateletcrit	-	Phenoscanner	27863252
rs1156533	6:30065149	rs916570	6:30066031	0.80425	Primary biliary cholangitis	-	Phenoscanner	23000144
rs1156533	6:30065149	rs9280888	6:30064849	1	Primary sclerosing cholangitis	Gastrointestinal	GWAS_ATLAS	27992413
rs1156533	6:30065149	-	-	-	Primary sclerosing cholangitis	-	Phenoscanner	27992413
rs1156533	6:30065149	rs9280888	6:30064849	1	Red cell distribution width	Immunological	GWAS_ATLAS	27863252
rs1156533	6:30065149	-	-	-	Red cell distribution width	-	Phenoscanner	27863252
rs1156533	6:30065149	-	-	-	Rheumatoid Arthritis	Connective Tissue	GWAS_ATLAS	24390342
rs1156533	6:30065149	-	-	-	Rheumatoid arthritis	-	Phenoscanner	24390342
rs1156533	6:30065149	rs9280888	6:30064849	1	Schizophrenia	Psychiatric	GWAS_ATLAS	29906448
rs1156533	6:30065149	-	-	-	Self-reported ankylosing spondylitis	-	Phenoscanner	UKBB
rs1156533	6:30065149	-	-	-	Self-reported hyperthyroidism or thyrotoxicosis	-	Phenoscanner	UKBB
rs1156533	6:30065149	-	-	-	Self-reported malabsorption or coeliac disease	-	Phenoscanner	UKBB
rs1156533	6:30065149	-	-	-	Self-reported psoriasis	-	Phenoscanner	UKBB
rs1156533	6:30065149	rs9280888	6:30064849	1	Sum basophil neutrophil count	Immunological	GWAS_ATLAS	27863252
rs1156533	6:30065149	-	-	-	Sum basophil neutrophil counts	-	Phenoscanner	27863252
rs1156533	6:30065149	rs9280888	6:30064849	1	Sum eosinophil basophil count	Immunological	GWAS_ATLAS	27863252
rs1156533	6:30065149	-	-	-	Sum eosinophil basophil counts	-	Phenoscanner	27863252
rs1156533	6:30065149	rs9280888	6:30064849	1	Sum neutrophil eosinophil count	Immunological	GWAS_ATLAS	27863252
rs1156533	6:30065149	-	-	-	Sum neutrophil eosinophil counts	-	Phenoscanner	27863252
rs1156533	6:30065149	rs9280888	6:30064849	1	Systemic Lupus Erythematosus	Skeletal	GWAS_ATLAS	29848360
rs1156533	6:30065149	rs9280888	6:30064849	1	Vitiligo	Dermatological	GWAS_ATLAS	27723757
rs1156533	6:30065149	rs916570	6:30066031	0.80425	Weight	-	Phenoscanner	UKBB
rs1156533	6:30065149	rs9280888	6:30064849	1	White blood cell count	Immunological	GWAS_ATLAS	27863252
rs1156533	6:30065149	-	-	-	White blood cell count	-	Phenoscanner	27863252
rs2180811	6:117780158	rs9387478	6:117786180	1	Adenocarcinoma	Neoplasms	GWAS_ATLAS	23143601
rs2180811	6:117780158	rs9387478	6:117786180	1	lung adenocarcinoma	-	GWAS_catalog	31326317
rs2180811	6:117780158	rs9387478	6:117786180	1	lung cancer	-	GWAS_catalog	23143601
rs2180811	6:117780158	rs9387478	6:117786180	1	Lung cancer	-	Phenoscanner	23143601
rs2180811	6:117780158	rs9387478	6:117786180	1	Lung cancer adenocarcinoma in never smoking women	-	Phenoscanner	23143601
rs2180811	6:117780158	rs9387478	6:117786180	1	Lung cancer in never smoking women	-	Phenoscanner	23143601
rs2180811	6:117780158	rs4946256	6:117781276	1	lung function (fev1/fvc)	-	GWAS_catalog	30595370
rs2327426	6:134202690	rs1969783	6:134159399	0.8459	Agents acting on the renin-angiotensin system	Environmental	GWAS_ATLAS	31015401
rs2327426	6:134202690	rs1969783	6:134159399	0.8459	Angina	Cardiovascular	GWAS_ATLAS	31427789
rs2327426	6:134202690	rs1969783	6:134159399	0.8459	Beta blocking agents	Environmental	GWAS_ATLAS	31015401
rs2327426	6:134202690	rs1969783	6:134159399	0.8459	Blood pressure medication	Activities	GWAS_ATLAS	31427789
rs2327426	6:134202690	rs1969783	6:134159399	0.8459	Calcium channel blockers	Environmental	GWAS_ATLAS	31015401
rs2327426	6:134202690	rs2105092	6:134184972	0.93553	cardiovascular disease	-	GWAS_catalog	30595370
rs2327426	6:134202690	rs1969783	6:134159399	0.8459	Chronic ischemic heart disease	Cardiovascular	GWAS_ATLAS	31427789
rs2327426	6:134202690	rs1969783	6:134159399	0.8459	Coronary artery disease	Cardiovascular	GWAS_ATLAS	26343387
rs2327426	6:134202690	-	-	-	Coronary artery disease	-	Phenoscanner	26343387
rs2327426	6:134202690	rs1966248	6:134159622	0.85021	coronary artery disease	-	GWAS_catalog	29212778
rs2327426	6:134202690	rs12202017	6:134173151	0.9125	coronary artery disease (myocardial infarction, percutaneous transluminal coronary angioplasty, coronary artery bypass grafting, angina or chromic ischemic heart disease)	-	GWAS_catalog	28714975
rs2327426	6:134202690	rs12524865	6:134196674	0.93553	coronary heart disease	-	GWAS_catalog	22751097
rs2327426	6:134202690	rs1969783	6:134159399	0.8459	Diuretics	Environmental	GWAS_ATLAS	31015401
rs2327426	6:134202690	rs1969783	6:134159399	0.8459	Essential (primary) hypertension	Cardiovascular	GWAS_ATLAS	31427789
rs2327426	6:134202690	rs1969783	6:134159399	0.8459	High blood pressure	Cardiovascular	GWAS_ATLAS	31427789
rs2327426	6:134202690	rs1969783	6:134159399	0.8459	Hypertension	Cardiovascular	GWAS_ATLAS	31427789
rs2327426	6:134202690	rs2105092	6:134184972	0.93553	medication use (agents acting on the renin-angiotensin system)	-	GWAS_catalog	31015401
rs2327426	6:134202690	rs2105092	6:134184972	0.93553	medication use (beta blocking agents)	-	GWAS_catalog	31015401
rs2327426	6:134202690	-	-	-	Myocardial infarction	-	Phenoscanner	26343387
rs2327426	6:134202690	rs1969783	6:134159399	0.8459	PEF	Respiratory	GWAS_ATLAS	30804560
rs2327426	6:134202690	rs1969783	6:134159399	0.8459	Pulse rate	Cardiovascular	GWAS_ATLAS	31427789
rs2327426	6:134202690	-	-	-	Pulse rate	-	Phenoscanner	UKBB
rs2327426	6:134202690	rs1969783	6:134159399	0.8459	Resting heart rate	Cardiovascular	GWAS_ATLAS	30940143
rs2327426	6:134202690	rs2105092	6:134184972	0.93553	Self-reported hypertension	-	Phenoscanner	UKBB
rs2327426	6:134202690	rs2327429	6:134209837	0.88576	systolic blood pressure	-	GWAS_catalog	30595370
rs2327426	6:134202690	rs2105092	6:134184972	0.93553	Vascular or heart problems diagnosed by doctor: high blood pressure	-	Phenoscanner	UKBB
rs2327426	6:134202690	-	-	-	Vascular or heart problems diagnosed by doctor: none of the above	-	Phenoscanner	UKBB
rs3020338	6:152034062	rs851977	6:152029608	0.85511	birth length (mtag)	-	GWAS_catalog	31681408
rs3020338	6:152034062	rs1101081	6:152032917	0.86816	birth weight	-	GWAS_catalog	27680694
rs3020338	6:152034062	rs851981	6:152027074	0.94751	Birth weight	Metabolic	GWAS_ATLAS	31427789
rs3020338	6:152034062	-	-	-	Birth weight	-	Phenoscanner	UKBB
rs3020338	6:152034062	rs10872678	6:152039964	0.86377	birth weight (mtag)	-	GWAS_catalog	31681408
rs3020338	6:152034062	rs851981	6:152027074	0.94751	Bone mineral density	Skeletal	GWAS_ATLAS	29304378
rs3020338	6:152034062	rs851980	6:152027955	0.95797	bone mineral density (spine)	-	GWAS_catalog	30172743
rs3020338	6:152034062	rs3020340	6:152043290	0.85511	bone mineral density (ward's triangle area)	-	GWAS_catalog	27397699
rs3020338	6:152034062	rs2206949	6:152037556	0.86377	endometriosis	-	GWAS_catalog	28537267
rs3020338	6:152034062	rs851981	6:152027074	0.94751	Heel bone mineral density	Skeletal	GWAS_ATLAS	30048462
rs3020338	6:152034062	-	-	-	Heel bone mineral density	-	Phenoscanner	UKBB
rs3020338	6:152034062	-	-	-	Heel bone mineral density left	-	Phenoscanner	UKBB
rs3020338	6:152034062	-	-	-	Heel bone mineral density right	-	Phenoscanner	UKBB
rs3020338	6:152034062	rs7772579	6:152042502	0.85511	offspring birth weight	-	GWAS_catalog	31043758
rs3020338	6:152034062	rs851978	6:152029556	0.86377	Waist-hip ratio	Metabolic	GWAS_ATLAS	30239722
rs9322356	6:152408659	rs6941835	6:152356270	1	Height	Skeletal	GWAS_ATLAS	30124842
rs9322356	6:152408659	rs6941835	6:152356270	1	Sitting height	Skeletal	GWAS_ATLAS	31427789
rs9322356	6:152408659	-	-	-	Sitting height	-	Phenoscanner	UKBB
rs9322356	6:152408659	rs6941835	6:152356270	1	Systolic Blood Pressure	Cardiovascular	GWAS_ATLAS	31427789
rs3253	6:169616112	rs6605526	6:169604100	0.95919	FEV2	Respiratory	GWAS_ATLAS	30804560
rs3253	6:169616112	-	-	-	Forced expiratory volume in 1-second	-	Phenoscanner	UKBB
rs3253	6:169616112	-	-	-	Forced expiratory volume in 1-second, best measure	-	Phenoscanner	UKBB
rs3253	6:169616112	-	-	-	Forced vital capacity	-	Phenoscanner	UKBB
rs3253	6:169616112	-	-	-	Forced vital capacity, best measure	-	Phenoscanner	UKBB
rs3253	6:169616112	rs6605526	6:169604100	0.95919	FVC	Respiratory	GWAS_ATLAS	30804560
rs3253	6:169616112	-	-	-	lung function (fvc)	-	GWAS_catalog	30595370
rs6462976	7:40396300	rs2329772	7:40476625	0.88802	moyamoya disease	-	GWAS_catalog	29273593
rs6462976	7:40396300	rs17171704	7:40421488	0.90762	Pulse pressure	Cardiovascular	GWAS_ATLAS	29403010
rs4556017	7:100632790	rs7797740	7:100618993	0.92379	Diastolic Blood Pressure	Cardiovascular	GWAS_ATLAS	31427789
rs4556017	7:100632790	-	-	-	Diastolic blood pressure	-	Phenoscanner	UKBB
rs4556017	7:100632790	rs7797740	7:100618993	0.92379	Heart rate recovery at 10 secnds	Cardiovascular	GWAS_ATLAS	29497042
rs4556017	7:100632790	rs7797740	7:100618993	0.92379	Heart rate recovery at 20 secnds	Cardiovascular	GWAS_ATLAS	29497042
rs4556017	7:100632790	rs7797740	7:100618993	0.92379	Heart rate recovery at 30 secnds	Cardiovascular	GWAS_ATLAS	29497042
rs4556017	7:100632790	rs7797740	7:100618993	0.92379	Heart rate recovery at 40 secnds	Cardiovascular	GWAS_ATLAS	29497042
rs4556017	7:100632790	rs7797740	7:100618993	0.92379	Heart rate recovery at 50 secnds	Cardiovascular	GWAS_ATLAS	29497042
rs4556017	7:100632790	rs7797740	7:100618993	0.92379	Heel bone mineral density	Skeletal	GWAS_ATLAS	30048462
rs4556017	7:100632790	rs7797740	7:100618993	0.92379	Pulse rate	Cardiovascular	GWAS_ATLAS	31427789
rs4556017	7:100632790	-	-	-	Pulse rate	-	Phenoscanner	UKBB
rs4556017	7:100632790	rs7797740	7:100618993	0.92379	Resting heart rate	Cardiovascular	GWAS_ATLAS	30940143
rs7778418	7:102429704	rs2411046	7:102419304	0.9908	Chronotype	Psychiatric	GWAS_ATLAS	31427789
rs7778418	7:102429704	rs6949391	7:102446863	0.95006	diverticular disease	-	GWAS_catalog	30177863
rs7778418	7:102429704	rs139389026	7:102412361	0.99082	Diverticular disease	Gastrointestinal	GWAS_ATLAS	30661054
rs7778418	7:102429704	rs10953374	7:102442173	0.95006	Diverticular disease of intestine	Gastrointestinal	GWAS_ATLAS	31427789
rs7778418	7:102429704	-	-	-	Morning or evening person	-	Phenoscanner	UKBB
rs7778418	7:102429704	rs6465876	7:102497569	0.86312	morning person	-	GWAS_catalog	30696823
rs7778418	7:102429704	rs3972456	7:102436907	0.98163	morning vs. evening chronotype	-	GWAS_catalog	26835600
rs806169	7:127300668	rs806188	7:127268806	0.95207	Anxious	Psychiatric	GWAS_ATLAS	31427789
rs806169	7:127300668	rs806174	7:127291072	0.99116	Birth weight	Metabolic	GWAS_ATLAS	31427789
rs806169	7:127300668	rs806166	7:127309934	0.99116	feeling worry	-	GWAS_catalog	29500382
rs806169	7:127300668	rs712707	7:127322614	0.9824	general risk tolerance (mtag)	-	GWAS_catalog	30643258
rs806169	7:127300668	-	-	-	Worrier or anxious feelings	-	Phenoscanner	UKBB
rs13271626	8:22467760	rs3064	8:22451688	0.90905	Estimated glomerular filtration rate	Metabolic	GWAS_ATLAS	31152163
rs13271626	8:22467760	rs11778693	8:22462852	0.96489	exploratory eye movement dysfunction in schizophrenia (cognitive search score)	-	GWAS_catalog	26242244
rs13271626	8:22467760	rs11778693	8:22462852	0.96489	exploratory eye movement dysfunction in schizophrenia (responsive search score)	-	GWAS_catalog	26242244
rs13271626	8:22467760	rs1545837	8:22477807	0.83145	FVC	Respiratory	GWAS_ATLAS	30804560
rs13271626	8:22467760	rs1545837	8:22477807	0.83145	lung function (fvc)	-	GWAS_catalog	30595370
rs13271626	8:22467760	rs2280104	8:22525980	0.81758	parkinson's disease	-	GWAS_catalog	28892059
rs13271626	8:22467760	rs2280104	8:22525980	0.81758	parkinson's disease or first degree relation to individual with parkinson's disease	-	GWAS_catalog	31701892
rs13271626	8:22467760	rs4872007	8:22538879	0.86475	superior temporal gyrus volume	-	GWAS_catalog	31530798
rs13271626	8:22467760	rs746011	8:22457804	0.95576	triglycerides	-	GWAS_catalog	30275531
rs1838392	8:71682583	rs34326193	8:71502376	0.80721	Bone mineral density	Skeletal	GWAS_ATLAS	28869591
rs1838392	8:71682583	rs7003794	8:71789146	0.99168	heel bone mineral density	-	GWAS_catalog	28869591
rs1838392	8:71682583	rs34326193	8:71502376	0.80721	Heel bone mineral density	Skeletal	GWAS_ATLAS	30048462
rs1838392	8:71682583	-	-	-	Heel bone mineral density	-	Phenoscanner	UKBB
rs1838392	8:71682583	-	-	-	Heel bone mineral density left	-	Phenoscanner	UKBB
rs1838392	8:71682583	rs7844508	8:71602995	0.97935	Snoring	Psychiatric	GWAS_ATLAS	30804565
rs1838392	8:71682583	rs7844508	8:71602995	0.97935	Waist-hip ratio	Metabolic	GWAS_ATLAS	30239722
rs1838392	8:71682583	rs1481801	8:71989719	0.85102	waist-hip ratio	-	GWAS_catalog	30595370
rs2581260	8:77493526	-	-	-	Heel bone mineral density	Skeletal	GWAS_ATLAS	30048462
rs2581260	8:77493526	-	-	-	heel bone mineral density	-	GWAS_catalog	30595370
rs10956488	8:130717755	-	-	-	Arm fat-free mass left	-	Phenoscanner	UKBB
rs10956488	8:130717755	-	-	-	Arm fat-free mass right	-	Phenoscanner	UKBB
rs10956488	8:130717755	-	-	-	Arm predicted mass left	-	Phenoscanner	UKBB
rs10956488	8:130717755	-	-	-	Arm predicted mass right	-	Phenoscanner	UKBB
rs10956488	8:130717755	-	-	-	Back pain	Neurological	GWAS_ATLAS	31427789
rs10956488	8:130717755	-	-	-	Basal metabolic rate	-	Phenoscanner	UKBB
rs10956488	8:130717755	-	-	-	Comparative height size	Skeletal	GWAS_ATLAS	31427789
rs10956488	8:130717755	-	-	-	Comparative height size at age 10	-	Phenoscanner	UKBB
rs10956488	8:130717755	-	-	-	Forced vital capacity	-	Phenoscanner	UKBB
rs10956488	8:130717755	-	-	-	Forced vital capacity, best measure	-	Phenoscanner	UKBB
rs10956488	8:130717755	-	-	-	Heel bone mineral density	Skeletal	GWAS_ATLAS	30048462
rs10956488	8:130717755	-	-	-	Height	Skeletal	GWAS_ATLAS	31427789
rs10956488	8:130717755	-	-	-	Height	-	Phenoscanner	UKBB
rs10956488	8:130717755	-	-	-	Impedance measures - Arm fat-free mass (left)	Metabolic	GWAS_ATLAS	31427789
rs10956488	8:130717755	-	-	-	Impedance measures - Arm fat-free mass (right)	Metabolic	GWAS_ATLAS	31427789
rs10956488	8:130717755	-	-	-	Impedance measures - Arm predicted mass (left)	Metabolic	GWAS_ATLAS	31427789
rs10956488	8:130717755	-	-	-	Impedance measures - Arm predicted mass (right)	Metabolic	GWAS_ATLAS	31427789
rs10956488	8:130717755	-	-	-	Impedance measures - Basal metabolic rate	Metabolic	GWAS_ATLAS	31427789
rs10956488	8:130717755	-	-	-	Impedance measures - Leg fat-free mass (left)	Metabolic	GWAS_ATLAS	31427789
rs10956488	8:130717755	-	-	-	Impedance measures - Leg fat-free mass (right)	Metabolic	GWAS_ATLAS	31427789
rs10956488	8:130717755	-	-	-	Impedance measures - Leg predicted mass (left)	Metabolic	GWAS_ATLAS	31427789
rs10956488	8:130717755	-	-	-	Impedance measures - Leg predicted mass (right)	Metabolic	GWAS_ATLAS	31427789
rs10956488	8:130717755	-	-	-	Impedance measures - Trunk fat-free mass	Metabolic	GWAS_ATLAS	31427789
rs10956488	8:130717755	-	-	-	Impedance measures - Trunk predicted mass	Metabolic	GWAS_ATLAS	31427789
rs10956488	8:130717755	-	-	-	Impedance measures - Whole body fat-free mass	Metabolic	GWAS_ATLAS	31427789
rs10956488	8:130717755	-	-	-	Impedance measures - Whole body water mass	Metabolic	GWAS_ATLAS	31427789
rs10956488	8:130717755	-	-	-	Leg fat-free mass left	-	Phenoscanner	UKBB
rs10956488	8:130717755	-	-	-	Leg fat-free mass right	-	Phenoscanner	UKBB
rs10956488	8:130717755	-	-	-	Leg predicted mass left	-	Phenoscanner	UKBB
rs10956488	8:130717755	-	-	-	Leg predicted mass right	-	Phenoscanner	UKBB
rs10956488	8:130717755	-	-	-	Leg-lef fat ratio	Metabolic	GWAS_ATLAS	30664634
rs10956488	8:130717755	-	-	-	Sitting height	Skeletal	GWAS_ATLAS	31427789
rs10956488	8:130717755	-	-	-	Sitting height	-	Phenoscanner	UKBB
rs10956488	8:130717755	-	-	-	Trunk fat-free mass	-	Phenoscanner	UKBB
rs10956488	8:130717755	-	-	-	Trunk predicted mass	-	Phenoscanner	UKBB
rs10956488	8:130717755	-	-	-	Trunk-trunk fat ratio	Metabolic	GWAS_ATLAS	30664634
rs10956488	8:130717755	-	-	-	Whole body fat-free mass	-	Phenoscanner	UKBB
rs10956488	8:130717755	-	-	-	Whole body water mass	-	Phenoscanner	UKBB
rs58579887	8:145028587	rs7014582	8:144990528	0.82786	5-oxoproline	Metabolic	GWAS_ATLAS	24816252
rs58579887	8:145028587	rs7003580	8:145007534	0.95547	anti-saccade response	-	GWAS_catalog	29064472
rs58579887	8:145028587	-	-	-	Arm fat-free mass left	-	Phenoscanner	UKBB
rs58579887	8:145028587	-	-	-	Arm fat-free mass right	-	Phenoscanner	UKBB
rs58579887	8:145028587	-	-	-	Arm predicted mass left	-	Phenoscanner	UKBB
rs58579887	8:145028587	-	-	-	Arm predicted mass right	-	Phenoscanner	UKBB
rs58579887	8:145028587	rs11777239	8:145031265	0.9716	Basal metabolic rate	-	Phenoscanner	UKBB
rs58579887	8:145028587	rs7819099	8:144992862	0.85686	Body of corpus callosum fractional anisotropy	Neurological	GWAS_ATLAS	BioRxiv: https://doi.org/10.1101/288558
rs58579887	8:145028587	rs7819099	8:144992862	0.85686	Body of corpus callosum radial diusivities	Neurological	GWAS_ATLAS	BioRxiv: https://doi.org/10.1101/288646
rs58579887	8:145028587	rs11136342	8:145044749	0.91195	Cholesterol lowering medication	Activities	GWAS_ATLAS	31427789
rs58579887	8:145028587	rs7155	8:144989462	0.82004	Comparative height size	Skeletal	GWAS_ATLAS	31427789
rs58579887	8:145028587	-	-	-	Comparative height size at age 10	-	Phenoscanner	UKBB
rs58579887	8:145028587	rs11136336	8:145007187	0.95566	fat-free mass	-	GWAS_catalog	30593698
rs58579887	8:145028587	rs7464572	8:145021167	0.96362	fibrinogen	-	GWAS_catalog	23969696
rs58579887	8:145028587	rs7464572	8:145021167	0.96362	fibrinogen levels	-	GWAS_catalog	28107422
rs58579887	8:145028587	rs7819099	8:144992862	0.85686	Genu of corpus callosum mean diusivities	Neurological	GWAS_ATLAS	BioRxiv: https://doi.org/10.1101/288609
rs58579887	8:145028587	rs7155	8:144989462	0.82004	Genu of corpus callosum radial diusivities	Neurological	GWAS_ATLAS	BioRxiv: https://doi.org/10.1101/288653
rs58579887	8:145028587	rs11783772	8:145008443	0.95566	height	-	GWAS_catalog	30595370
rs58579887	8:145028587	rs7155	8:144989462	0.82004	Height	Skeletal	GWAS_ATLAS	31427789
rs58579887	8:145028587	-	-	-	Height	-	Phenoscanner	UKBB
rs58579887	8:145028587	rs7155	8:144989462	0.82004	HMG CoA reductase inhibitors	Environmental	GWAS_ATLAS	31015401
rs58579887	8:145028587	rs7155	8:144989462	0.82004	Impedance measures - Arm fat-free mass (left)	Metabolic	GWAS_ATLAS	31427789
rs58579887	8:145028587	rs7155	8:144989462	0.82004	Impedance measures - Arm fat-free mass (right)	Metabolic	GWAS_ATLAS	31427789
rs58579887	8:145028587	rs7155	8:144989462	0.82004	Impedance measures - Arm predicted mass (left)	Metabolic	GWAS_ATLAS	31427789
rs58579887	8:145028587	rs7155	8:144989462	0.82004	Impedance measures - Arm predicted mass (right)	Metabolic	GWAS_ATLAS	31427789
rs58579887	8:145028587	rs7014582	8:144990528	0.82786	Impedance measures - Basal metabolic rate	Metabolic	GWAS_ATLAS	31427789
rs58579887	8:145028587	rs7155	8:144989462	0.82004	Impedance measures - Trunk fat-free mass	Metabolic	GWAS_ATLAS	31427789
rs58579887	8:145028587	rs7155	8:144989462	0.82004	Impedance measures - Trunk predicted mass	Metabolic	GWAS_ATLAS	31427789
rs58579887	8:145028587	rs7155	8:144989462	0.82004	Impedance measures - Whole body fat-free mass	Metabolic	GWAS_ATLAS	31427789
rs58579887	8:145028587	rs7155	8:144989462	0.82004	Impedance measures - Whole body water mass	Metabolic	GWAS_ATLAS	31427789
rs58579887	8:145028587	rs11777239	8:145031265	0.9716	LDL cholesterol	-	Phenoscanner	20686565
rs58579887	8:145028587	rs55831924	8:145031968	0.85753	ldl cholesterol	-	GWAS_catalog	30275531
rs58579887	8:145028587	rs7832643	8:145022657	0.96354	ldl cholesterol levels	-	GWAS_catalog	28334899
rs58579887	8:145028587	rs11777239	8:145031265	0.9716	Low density lipoprotein	-	Phenoscanner	24097068
rs58579887	8:145028587	rs11783655	8:145037573	0.93559	low density lipoprotein cholesterol levels	-	GWAS_catalog	29507422
rs58579887	8:145028587	rs7014582	8:144990528	0.82786	Low-density lipoprotein cholesterol	Metabolic	GWAS_ATLAS	24097068
rs58579887	8:145028587	rs7819099	8:144992862	0.85686	Mean corpuscular volume	Immunological	GWAS_ATLAS	27863252
rs58579887	8:145028587	-	-	-	Mean corpuscular volume	-	Phenoscanner	27863252
rs58579887	8:145028587	rs7155	8:144989462	0.82004	Mean platelet volume	Immunological	GWAS_ATLAS	27863252
rs58579887	8:145028587	-	-	-	Mean platelet volume	-	Phenoscanner	27863252
rs58579887	8:145028587	rs11787365	8:145041333	0.94749	medication use (hmg coa reductase inhibitors)	-	GWAS_catalog	31015401
rs58579887	8:145028587	rs11136335	8:145003777	0.8057	mosquito bite size	-	GWAS_catalog	28199695
rs58579887	8:145028587	rs11780978	8:145034852	0.94354	osteoarthritis (hip)	-	GWAS_catalog	30374069
rs58579887	8:145028587	rs11780978	8:145034852	0.94354	osteoarthritis of the hip (hospital diagnosed)	-	GWAS_catalog	29559693
rs58579887	8:145028587	rs7833924	8:144996029	0.86044	platelet count	-	GWAS_catalog	27863252
rs58579887	8:145028587	rs7155	8:144989462	0.82004	Platelet count	Immunological	GWAS_ATLAS	27863252
rs58579887	8:145028587	-	-	-	Platelet count	-	Phenoscanner	27863252
rs58579887	8:145028587	rs7155	8:144989462	0.82004	Platelet distribution width	Immunological	GWAS_ATLAS	27863252
rs58579887	8:145028587	-	-	-	Platelet distribution width	-	Phenoscanner	27863252
rs58579887	8:145028587	rs7155	8:144989462	0.82004	Plateletcrit	Immunological	GWAS_ATLAS	27863252
rs58579887	8:145028587	-	-	-	Plateletcrit	-	Phenoscanner	27863252
rs58579887	8:145028587	rs7155	8:144989462	0.82004	post bronchodilator fev1	-	GWAS_catalog	26634245
rs58579887	8:145028587	rs7819099	8:144992862	0.85686	red blood cell count	-	GWAS_catalog	30595370
rs58579887	8:145028587	rs7155	8:144989462	0.82004	Sitting height	Skeletal	GWAS_ATLAS	31427789
rs58579887	8:145028587	-	-	-	Sitting height	-	Phenoscanner	UKBB
rs58579887	8:145028587	rs11784762	8:145009610	0.94757	Total cholesterol	Metabolic	GWAS_ATLAS	24097068
rs58579887	8:145028587	rs11777239	8:145031265	0.9716	Total cholesterol	-	Phenoscanner	24097068
rs58579887	8:145028587	rs11784762	8:145009610	0.94757	Total cholesterol in IDL	Metabolic	GWAS_ATLAS	27005778
rs58579887	8:145028587	rs62523994	8:145026582	0.9635	Total cholesterol in LDL	Metabolic	GWAS_ATLAS	27005778
rs58579887	8:145028587	rs7832643	8:145022657	0.96354	total cholesterol levels	-	GWAS_catalog	28334899
rs58579887	8:145028587	rs62523994	8:145026582	0.9635	Total lipids in IDL	Metabolic	GWAS_ATLAS	27005778
rs58579887	8:145028587	-	-	-	Trunk fat-free mass	-	Phenoscanner	UKBB
rs58579887	8:145028587	-	-	-	Trunk predicted mass	-	Phenoscanner	UKBB
rs58579887	8:145028587	rs11777239	8:145031265	0.9716	white matter microstructure (radial diusivities)	-	GWAS_catalog	31666681
rs58579887	8:145028587	-	-	-	Whole body fat-free mass	-	Phenoscanner	UKBB
rs58579887	8:145028587	-	-	-	Whole body water mass	-	Phenoscanner	UKBB
rs1333047	9:22124504	rs10757274	9:22096055	0.83651	abdominal aortic aneurysm	-	GWAS_catalog	27899403
rs1333047	9:22124504	-	-	-	Acute myocardial infarction	-	Phenoscanner	UKBB
rs1333047	9:22124504	rs1333048	9:22125347	0.87696	age-related diseases and mortality	-	GWAS_catalog	27790247
rs1333047	9:22124504	rs1333049	9:22125503	0.93387	age-related diseases, mortality and associated endophenotypes	-	GWAS_catalog	27790247
rs1333047	9:22124504	rs10738606	9:22088090	0.85091	Agents acting on the renin-angiotensin system	Environmental	GWAS_ATLAS	31015401
rs1333047	9:22124504	rs10738606	9:22088090	0.85091	Angina	Cardiovascular	GWAS_ATLAS	31427789
rs1333047	9:22124504	-	-	-	Angina pectoris	-	Phenoscanner	UKBB
rs1333047	9:22124504	rs10738606	9:22088090	0.85091	Antithrombotic agents	Environmental	GWAS_ATLAS	31015401
rs1333047	9:22124504	rs10738606	9:22088090	0.85091	Aspirin	Activities	GWAS_ATLAS	31427789
rs1333047	9:22124504	rs10738606	9:22088090	0.85091	Atenolol	Activities	GWAS_ATLAS	31427789
rs1333047	9:22124504	rs10738606	9:22088090	0.85091	Atorvastatin	Activities	GWAS_ATLAS	31427789
rs1333047	9:22124504	rs10738606	9:22088090	0.85091	Beta blocking agents	Environmental	GWAS_ATLAS	31015401
rs1333047	9:22124504	rs9644862	9:22090936	0.87051	carotid plaque burden	-	GWAS_catalog	28282560
rs1333047	9:22124504	rs10738606	9:22088090	0.85091	Cholesterol lowering medication	Activities	GWAS_ATLAS	31427789
rs1333047	9:22124504	-	-	-	Chronic ischaemic heart disease	-	Phenoscanner	UKBB
rs1333047	9:22124504	rs10738606	9:22088090	0.85091	Chronic ischemic heart disease	Cardiovascular	GWAS_ATLAS	31427789
rs1333047	9:22124504	rs1412834	9:22110131	0.87178	colorectal cancer	-	GWAS_catalog	31089142
rs1333047	9:22124504	rs1333049	9:22125503	0.93387	coronary artery calcification	-	GWAS_catalog	22144573
rs1333047	9:22124504	-	-	-	Coronary artery calcification CAC	-	Phenoscanner	22144573
rs1333047	9:22124504	-	-	-	Coronary artery calcification CAC excluding previous myocardial infarction cases	-	Phenoscanner	22144573
rs1333047	9:22124504	-	-	-	Coronary artery disease	-	Phenoscanner	21378990
rs1333047	9:22124504	rs10738606	9:22088090	0.85091	Coronary artery disease	Cardiovascular	GWAS_ATLAS	26343387
rs1333047	9:22124504	rs10738607	9:22088094	0.85091	coronary artery disease	-	GWAS_catalog	26708285
rs1333047	9:22124504	rs2891168	9:22098619	0.83651	coronary artery disease (myocardial infarction, percutaneous transluminal coronary angioplasty, coronary artery bypass grafting, angina or chromic ischemic heart disease)	-	GWAS_catalog	28714975
rs1333047	9:22124504	rs1333049	9:22125503	0.93387	coronary artery disease or ischemic stroke	-	GWAS_catalog	24262325
rs1333047	9:22124504	rs1333049	9:22125503	0.93387	coronary artery disease or large artery stroke	-	GWAS_catalog	24262325
rs1333047	9:22124504	rs10757278	9:22124477	0.96478	Coronary heart disease	-	Phenoscanner	21347282
rs1333047	9:22124504	rs10757274	9:22096055	0.83651	coronary heart disease	-	GWAS_catalog	22751097
rs1333047	9:22124504	rs10738606	9:22088090	0.85091	Cup area	Ophthalmological	GWAS_ATLAS	28073927
rs1333047	9:22124504	rs1333045	9:22119195	0.82743	Diabetes	Endocrine	GWAS_ATLAS	31427789
rs1333047	9:22124504	rs9644861	9:22090935	0.88859	diastolic blood pressure	-	GWAS_catalog	30578418
rs1333047	9:22124504	rs10738606	9:22088090	0.85091	Disorders of lipoprotein metabolism and other lipidemias	Metabolic	GWAS_ATLAS	31427789
rs1333047	9:22124504	rs10757272	9:22088260	0.84351	endometriosis	-	GWAS_catalog	28537267
rs1333047	9:22124504	rs10738606	9:22088090	0.85091	Family (maternal) history of Heart disease	Environment	GWAS_ATLAS	31427789
rs1333047	9:22124504	rs10738606	9:22088090	0.85091	Family (paternal) history of Bowel cancer	Environment	GWAS_ATLAS	31427789
rs1333047	9:22124504	rs10738606	9:22088090	0.85091	Family (paternal) history of Heart disease	Environment	GWAS_ATLAS	31427789
rs1333047	9:22124504	rs10738606	9:22088090	0.85091	Family (siblings) history of Heart disease	Environment	GWAS_ATLAS	31427789
rs1333047	9:22124504	rs10738606	9:22088090	0.85091	Family history of certain disabilities and chronic diseases (leading to disablement)	Mortality	GWAS_ATLAS	31427789
rs1333047	9:22124504	rs10738606	9:22088090	0.85091	Father's age at death	Mortality	GWAS_ATLAS	31427789
rs1333047	9:22124504	-	-	-	Fathers age at death	-	Phenoscanner	UKBB
rs1333047	9:22124504	rs10738606	9:22088090	0.85091	Hair colour: Black	Dermatological	GWAS_ATLAS	31427789
rs1333047	9:22124504	rs10738606	9:22088090	0.85091	Hair colour: Dark brown	Dermatological	GWAS_ATLAS	31427789
rs1333047	9:22124504	rs1537371	9:22099568	0.89244	Hair colour: Light brown	Dermatological	GWAS_ATLAS	31427789
rs1333047	9:22124504	rs7859727	9:22102165	0.85827	healthspan	-	GWAS_catalog	30729179
rs1333047	9:22124504	rs1556516	9:22100176	0.89244	heart failure	-	GWAS_catalog	31919418
rs1333047	9:22124504	rs10738606	9:22088090	0.85091	HMG CoA reductase inhibitors	Environmental	GWAS_ATLAS	31015401
rs1333047	9:22124504	-	-	-	hypertension	-	GWAS_catalog	30487518
rs1333047	9:22124504	-	-	-	Illnesses of father: heart disease	-	Phenoscanner	UKBB
rs1333047	9:22124504	-	-	-	Illnesses of father: none of the above, group 1	-	Phenoscanner	UKBB
rs1333047	9:22124504	-	-	-	Illnesses of mother: heart disease	-	Phenoscanner	UKBB
rs1333047	9:22124504	-	-	-	Illnesses of siblings: heart disease	-	Phenoscanner	UKBB
rs1333047	9:22124504	rs10757272	9:22088260	0.84351	intracranial aneurysm	-	GWAS_catalog	22286173
rs1333047	9:22124504	rs7866503	9:22091924	0.86667	intracranial, abdominal aortic or thoracic aortic aneurysm (pleiotropy)	-	GWAS_catalog	27418160
rs1333047	9:22124504	rs7859727	9:22102165	0.85827	ischemic stroke	-	GWAS_catalog	29531354
rs1333047	9:22124504	-	-	-	large artery stroke	-	GWAS_catalog	24262325
rs1333047	9:22124504	rs1333045	9:22119195	0.82743	Life span	Mortality	GWAS_ATLAS	28748955
rs1333047	9:22124504	rs10738606	9:22088090	0.85091	Long-standing illness, disability or infirmity	Mortality	GWAS_ATLAS	31427789
rs1333047	9:22124504	-	-	-	Medication for cholesterol, blood pressure or diabetes: cholesterol lowering medication	-	Phenoscanner	UKBB
rs1333047	9:22124504	-	-	-	Medication for pain relief, constipation, heartburn: aspirin	-	Phenoscanner	UKBB
rs1333047	9:22124504	rs2891168	9:22098619	0.83651	medication use (beta blocking agents)	-	GWAS_catalog	31015401
rs1333047	9:22124504	rs1537371	9:22099568	0.89244	medication use (hmg coa reductase inhibitors)	-	GWAS_catalog	31015401
rs1333047	9:22124504	-	-	-	medication use (vasodilators used in cardiac diseases)	-	GWAS_catalog	31015401
rs1333047	9:22124504	-	-	-	Myocardial infarction	-	Phenoscanner	26343387
rs1333047	9:22124504	rs10738607	9:22088094	0.85091	myocardial infarction	-	GWAS_catalog	26708285
rs1333047	9:22124504	rs4977574	9:22098574	0.83651	myocardial infarction (early onset)	-	GWAS_catalog	19198609
rs1333047	9:22124504	rs10738606	9:22088090	0.85091	Number of treatments/medications taken	Activities	GWAS_ATLAS	31427789
rs1333047	9:22124504	rs10738606	9:22088090	0.85091	Open-angle glaucoma	Ophthalmological	GWAS_ATLAS	29891935
rs1333047	9:22124504	rs1333042	9:22103813	0.8888	parental longevity (both parents in top 10%)	-	GWAS_catalog	29227965
rs1333047	9:22124504	rs1556516	9:22100176	0.89244	parental longevity (combined parental age at death)	-	GWAS_catalog	29227965
rs1333047	9:22124504	rs1556516	9:22100176	0.89244	parental longevity (combined parental attained age, martingale residuals)	-	GWAS_catalog	29227965
rs1333047	9:22124504	rs1556516	9:22100176	0.89244	parental longevity (father's age at death)	-	GWAS_catalog	29227965
rs1333047	9:22124504	rs1556516	9:22100176	0.89244	parental longevity (father's attained age)	-	GWAS_catalog	29227965
rs1333047	9:22124504	rs1333042	9:22103813	0.8888	parental longevity (mother's age at death or mother's attained age)	-	GWAS_catalog	31484785
rs1333047	9:22124504	rs1333045	9:22119195	0.82743	parental longevity (mother's age at death)	-	GWAS_catalog	29227965
rs1333047	9:22124504	rs10738606	9:22088090	0.85091	Presence of cardiac and vascular implants and grafts	Mortality	GWAS_ATLAS	31427789
rs1333047	9:22124504	rs1333045	9:22119195	0.82743	pulse pressure	-	GWAS_catalog	30578418
rs1333047	9:22124504	-	-	-	Self-reported angina	-	Phenoscanner	UKBB
rs1333047	9:22124504	-	-	-	Self-reported heart attack or myocardial infarction	-	Phenoscanner	UKBB
rs1333047	9:22124504	rs1333045	9:22119195	0.82743	serum total cholesterol levels	-	GWAS_catalog	31201950
rs1333047	9:22124504	rs10738606	9:22088090	0.85091	Simvastatin	Activities	GWAS_ATLAS	31427789
rs1333047	9:22124504	rs7859727	9:22102165	0.85827	stroke	-	GWAS_catalog	29531354
rs1333047	9:22124504	rs1333045	9:22119195	0.82743	systolic blood pressure	-	GWAS_catalog	30595370
rs1333047	9:22124504	rs10738607	9:22088094	0.85091	total cholesterol levels	-	GWAS_catalog	30275531
rs1333047	9:22124504	-	-	-	Treatment with aspirin	-	Phenoscanner	UKBB
rs1333047	9:22124504	-	-	-	Treatment with atorvastatin	-	Phenoscanner	UKBB
rs1333047	9:22124504	-	-	-	Treatment with bisoprolol	-	Phenoscanner	UKBB
rs1333047	9:22124504	-	-	-	Treatment with clopidogrel	-	Phenoscanner	UKBB
rs1333047	9:22124504	-	-	-	Treatment with nicorandil	-	Phenoscanner	UKBB
rs1333047	9:22124504	-	-	-	Treatment with simvastatin	-	Phenoscanner	UKBB
rs1333047	9:22124504	rs1333045	9:22119195	0.82743	Type 2 Diabetes	Endocrine	GWAS_ATLAS	31427789
rs1333047	9:22124504	-	-	-	Vascular or heart problems diagnosed by doctor: angina	-	Phenoscanner	UKBB
rs1333047	9:22124504	-	-	-	Vascular or heart problems diagnosed by doctor: heart attack	-	Phenoscanner	UKBB
rs1333047	9:22124504	rs10738606	9:22088090	0.85091	Vasodilators used in cardiac diseases	Environmental	GWAS_ATLAS	31015401
rs1333047	9:22124504	rs10738606	9:22088090	0.85091	Vertical cup-disc ratio	Ophthalmological	GWAS_ATLAS	28073927
rs755209	9:95489671	rs10992304	9:95085365	0.81825	Comparative height size	Skeletal	GWAS_ATLAS	31427789
rs755209	9:95489671	rs10992304	9:95085365	0.81825	FEV2	Respiratory	GWAS_ATLAS	30804560
rs755209	9:95489671	rs10992304	9:95085365	0.81825	Height	Skeletal	GWAS_ATLAS	25282103
rs755209	9:95489671	-	-	-	Height	-	Phenoscanner	UKBB
rs755209	9:95489671	rs10992304	9:95085365	0.81825	Impedance measures - Impedance of arm (left)	Metabolic	GWAS_ATLAS	31427789
rs755209	9:95489671	rs10992304	9:95085365	0.81825	Impedance measures - Impedance of arm (right)	Metabolic	GWAS_ATLAS	31427789
rs755209	9:95489671	rs10992304	9:95085365	0.81825	Impedance measures - Impedance of leg (left)	Metabolic	GWAS_ATLAS	31427789
rs755209	9:95489671	rs10992304	9:95085365	0.81825	Impedance measures - Impedance of whole body	Metabolic	GWAS_ATLAS	31427789
rs755209	9:95489671	-	-	-	Impedance of arm left	-	Phenoscanner	UKBB
rs755209	9:95489671	-	-	-	Impedance of arm right	-	Phenoscanner	UKBB
rs755209	9:95489671	-	-	-	Impedance of whole body	-	Phenoscanner	UKBB
rs755209	9:95489671	rs10992304	9:95085365	0.81825	Sitting height	Skeletal	GWAS_ATLAS	31427789
rs755209	9:95489671	rs10992304	9:95085365	0.81825	Trunk-trunk fat ratio	Metabolic	GWAS_ATLAS	30664634
rs755209	9:95489671	rs10992304	9:95085365	0.81825	Waist-hip ratio	Metabolic	GWAS_ATLAS	30239722
rs676996	9:136146077	chr9:136142203	9:136142203	0.99152	Activated partial thromboplastin time	-	Phenoscanner	22703881
rs676996	9:136146077	rs687621	9:136137065	0.98307	Activated partial thromboplastin time	Metabolic	GWAS_ATLAS	29403010
rs676996	9:136146077	rs687621	9:136137065	0.98307	ADpSGEGDFXAEGGGVR	Metabolic	GWAS_ATLAS	24816252
rs676996	9:136146077	-	-	-	Alkaline phosphatase	-	Phenoscanner	28887542
rs676996	9:136146077	rs687621	9:136137065	0.98307	Antithrombotic agents	Environmental	GWAS_ATLAS	31015401
rs676996	9:136146077	-	-	-	Arm fat percentage left	-	Phenoscanner	UKBB
rs676996	9:136146077	-	-	-	Arm fat percentage right	-	Phenoscanner	UKBB
rs676996	9:136146077	rs687289	9:136137106	0.98728	BCAM - Basal Cell Adhesion Molecule	Cell	GWAS_ATLAS	28240269
rs676996	9:136146077	-	-	-	Blood clot in the leg	-	Phenoscanner	UKBB
rs676996	9:136146077	-	-	-	Blood clot in the lung	-	Phenoscanner	UKBB
rs676996	9:136146077	chr9:136143442	9:136143442	0.9873	blood protein levels	-	GWAS_catalog	28240269
rs676996	9:136146077	rs687621	9:136137065	0.98307	Bone mineral density	Skeletal	GWAS_ATLAS	28869591
rs676996	9:136146077	chr9:136142355	9:136142355	0.87713	c-reactive protein levels	-	GWAS_catalog	30388399
rs676996	9:136146077	chr9:136142203	9:136142203	0.99152	Cardiovascular diseases	-	Phenoscanner	21239051
rs676996	9:136146077	rs687289	9:136137106	0.98728	CD209 - CD209 antigen	Cell	GWAS_ATLAS	28240269
rs676996	9:136146077	rs687289	9:136137106	0.98728	CD36 - Platelet glycoprotein 4	Cell	GWAS_ATLAS	28240269
rs676996	9:136146077	rs687621	9:136137065	0.98307	Cholesterol lowering medication	Activities	GWAS_ATLAS	31427789
rs676996	9:136146077	rs687289	9:136137106	0.98728	CHST15 - Carbohydrate sulfotransferase 15	Cell	GWAS_ATLAS	28240269
rs676996	9:136146077	chr9:136142203	9:136142203	0.99152	Circulating galectin 3 levels	-	Phenoscanner	23056639
rs676996	9:136146077	chr9:136149229	9:136149229	0.97891	clinical laboratory measurements	-	GWAS_catalog	27897004
rs676996	9:136146077	rs687621	9:136137065	0.98307	Coronary artery disease	Cardiovascular	GWAS_ATLAS	28714975
rs676996	9:136146077	chr9:136142203	9:136142203	0.99152	Coronary artery disease	-	Phenoscanner	28714975
rs676996	9:136146077	rs687621	9:136137065	0.98307	Creatine kinase	Metabolic	GWAS_ATLAS	29403010
rs676996	9:136146077	chr9:136144873	9:136144873	0.99152	creatine kinase levels	-	GWAS_catalog	29403010
rs676996	9:136146077	rs687621	9:136137065	0.98307	Diastolic Blood Pressure	Cardiovascular	GWAS_ATLAS	31427789
rs676996	9:136146077	-	-	-	Diastolic blood pressure	-	Phenoscanner	UKBB
rs676996	9:136146077	rs8176719	9:136132908	0.84854	Diverticular disease	Gastrointestinal	GWAS_ATLAS	30661054
rs676996	9:136146077	rs687621	9:136137065	0.98307	Diverticular disease of intestine	Gastrointestinal	GWAS_ATLAS	31427789
rs676996	9:136146077	chr9:136149229	9:136149229	0.97891	duodenal ulcer	-	GWAS_catalog	22387998
rs676996	9:136146077	chr9:136142355	9:136142355	0.87713	end-stage coagulation	-	GWAS_catalog	23381943
rs676996	9:136146077	chr9:136142203	9:136142203	0.99152	Factor XIII antigen	-	Phenoscanner	23381943
rs676996	9:136146077	-	-	-	Ferritin	-	Phenoscanner	28887542
rs676996	9:136146077	rs687621	9:136137065	0.98307	FEV2	Respiratory	GWAS_ATLAS	30804560
rs676996	9:136146077	rs687289	9:136137106	0.98728	FLT4 - Vascular endothelial growth factor receptor 3	Cell	GWAS_ATLAS	28240269
rs676996	9:136146077	chr9:136139265	9:136139265	0.87713	gastric parietal cell autoantibody levels in type 1 diabetes	-	GWAS_catalog	21829393
rs676996	9:136146077	rs687621	9:136137065	0.98307	Glycine	Metabolic	GWAS_ATLAS	31070104
rs676996	9:136146077	chr9:136149229	9:136149229	0.97891	graves' disease	-	GWAS_catalog	23612905
rs676996	9:136146077	-	-	-	Haemorrhoids	-	Phenoscanner	UKBB
rs676996	9:136146077	rs687621	9:136137065	0.98307	Hayfever, allergic rhinitis or eczema	Respiratory	GWAS_ATLAS	31427789
rs676996	9:136146077	rs8176719	9:136132908	0.84854	Heel bone mineral density	Skeletal	GWAS_ATLAS	30048462
rs676996	9:136146077	chr9:136142203	9:136142203	0.99152	Heel bone mineral density	-	Phenoscanner	UKBB
rs676996	9:136146077	rs8176719	9:136132908	0.84854	Hematocrit	Immunological	GWAS_ATLAS	27863252
rs676996	9:136146077	-	-	-	Hematocrit	-	Phenoscanner	27863252
rs676996	9:136146077	rs8176719	9:136132908	0.84854	Hemoglobin concentration	Immunological	GWAS_ATLAS	27863252
rs676996	9:136146077	-	-	-	Hemoglobin concentration	-	Phenoscanner	27863252
rs676996	9:136146077	rs687621	9:136137065	0.98307	High blood pressure	Cardiovascular	GWAS_ATLAS	31427789
rs676996	9:136146077	rs687621	9:136137065	0.98307	High cholesterol	Metabolic	GWAS_ATLAS	31427789
rs676996	9:136146077	-	-	-	High grade serous ovarian cancer	-	Phenoscanner	28346442
rs676996	9:136146077	rs687621	9:136137065	0.98307	HMG CoA reductase inhibitors	Environmental	GWAS_ATLAS	31015401
rs676996	9:136146077	rs687621	9:136137065	0.98307	Hypertension	Cardiovascular	GWAS_ATLAS	31427789
rs676996	9:136146077	chr9:136145484	9:136145484	0.99152	Impedance measures - Arm fat percentage (left)	Metabolic	GWAS_ATLAS	31427789
rs676996	9:136146077	chr9:136143372	9:136143372	0.99152	Impedance measures - Arm fat percentage (right)	Metabolic	GWAS_ATLAS	31427789
rs676996	9:136146077	rs687621	9:136137065	0.98307	Impedance measures - Arm fat-free mass (left)	Metabolic	GWAS_ATLAS	31427789
rs676996	9:136146077	rs687621	9:136137065	0.98307	Impedance measures - Arm fat-free mass (right)	Metabolic	GWAS_ATLAS	31427789
rs676996	9:136146077	rs687621	9:136137065	0.98307	Impedance measures - Arm predicted mass (left)	Metabolic	GWAS_ATLAS	31427789
rs676996	9:136146077	rs687621	9:136137065	0.98307	Impedance measures - Arm predicted mass (right)	Metabolic	GWAS_ATLAS	31427789
rs676996	9:136146077	rs687621	9:136137065	0.98307	Impedance measures - Impedance of arm (left)	Metabolic	GWAS_ATLAS	31427789
rs676996	9:136146077	rs687621	9:136137065	0.98307	Impedance measures - Impedance of arm (right)	Metabolic	GWAS_ATLAS	31427789
rs676996	9:136146077	rs687289	9:136137106	0.98728	Impedance measures - Trunk fat-free mass	Metabolic	GWAS_ATLAS	31427789
rs676996	9:136146077	-	-	-	Impedance of arm left	-	Phenoscanner	UKBB
rs676996	9:136146077	-	-	-	Impedance of arm right	-	Phenoscanner	UKBB
rs676996	9:136146077	chr9:136142355	9:136142355	0.87713	inflammatory biomarkers	-	GWAS_catalog	22291609
rs676996	9:136146077	rs687289	9:136137106	0.98728	INSR - Insulin receptor	Cell	GWAS_ATLAS	28240269
rs676996	9:136146077	chr9:136149229	9:136149229	0.97891	insulin disposition index	-	GWAS_catalog	23263489
rs676996	9:136146077	chr9:136142203	9:136142203	0.99152	Interleukin 6 IL 6 levels	-	Phenoscanner	22291609
rs676996	9:136146077	rs687289	9:136137106	0.98728	KDR - Vascular endothelial growth factor receptor 2	Cell	GWAS_ATLAS	28240269
rs676996	9:136146077	rs687289	9:136137106	0.98728	Lactate dehydrogenase	Metabolic	GWAS_ATLAS	29403010
rs676996	9:136146077	chr9:136142203	9:136142203	0.99152	LDL cholesterol	-	Phenoscanner	20686565
rs676996	9:136146077	rs8176719	9:136132908	0.84854	Leg-lef fat ratio	Metabolic	GWAS_ATLAS	30664634
rs676996	9:136146077	chr9:136139265	9:136139265	0.87713	liver enzyme levels	-	GWAS_catalog	18940312
rs676996	9:136146077	chr9:136142203	9:136142203	0.99152	Low density lipoprotein	-	Phenoscanner	24097068
rs676996	9:136146077	rs687621	9:136137065	0.98307	Low-density lipoprotein cholesterol	Metabolic	GWAS_ATLAS	24097068
rs676996	9:136146077	rs687289	9:136137106	0.98728	MBL2 - Mannose-binding protein C	Cell	GWAS_ATLAS	28240269
rs676996	9:136146077	rs687289	9:136137106	0.98728	MET - Hepatocyte growth factor receptor	Cell	GWAS_ATLAS	28240269
rs676996	9:136146077	chr9:136143442	9:136143442	0.9873	metabolic traits	-	GWAS_catalog	21886157
rs676996	9:136146077	rs8176719	9:136132908	0.84854	Monocyte count	Immunological	GWAS_ATLAS	27863252
rs676996	9:136146077	-	-	-	Monocyte count	-	Phenoscanner	27863252
rs676996	9:136146077	rs8176719	9:136132908	0.84854	Monocyte percentage of white cells	Immunological	GWAS_ATLAS	27863252
rs676996	9:136146077	-	-	-	Monocyte percentage of white cells	-	Phenoscanner	27863252
rs676996	9:136146077	rs687621	9:136137065	0.98307	Myeloid white cell count	Immunological	GWAS_ATLAS	27863252
rs676996	9:136146077	-	-	-	Myeloid white cell count	-	Phenoscanner	27863252
rs676996	9:136146077	-	-	-	Myocardial infarction	-	Phenoscanner	26343387
rs676996	9:136146077	chr9:136142203	9:136142203	0.99152	Myocardial infarction in coronary artery disease	-	Phenoscanner	21239051
rs676996	9:136146077	chr9:136142203	9:136142203	0.99152	Myocardial infarction in patients with coronary artery disease by angiography	-	Phenoscanner	21239051
rs676996	9:136146077	-	-	-	No blood clot, bronchitis, emphysema, asthma, rhinitis, eczema or allergy diagnosed by doctor	-	Phenoscanner	UKBB
rs676996	9:136146077	rs8176645	9:136149098	0.86458	Non-albumin protein	Metabolic	GWAS_ATLAS	29403010
rs676996	9:136146077	chr9:136139265	9:136139265	0.87713	obesity-related traits	-	GWAS_catalog	23251661
rs676996	9:136146077	chr9:136149229	9:136149229	0.97891	pancreatic cancer	-	GWAS_catalog	19648918
rs676996	9:136146077	chr9:136149229	9:136149229	0.97891	Pancreatic Cancer	Neoplasms	GWAS_ATLAS	22523087
rs676996	9:136146077	-	-	-	Peak expiratory flow	-	Phenoscanner	UKBB
rs676996	9:136146077	rs687621	9:136137065	0.98307	PEF	Respiratory	GWAS_ATLAS	30804560
rs676996	9:136146077	chr9:136149229	9:136149229	0.97891	peripheral artery disease	-	GWAS_catalog	31285632
rs676996	9:136146077	rs687621	9:136137065	0.98307	Personal history of certain other diseases	Mortality	GWAS_ATLAS	31427789
rs676996	9:136146077	rs687621	9:136137065	0.98307	Personal history of medical treatment	Mortality	GWAS_ATLAS	31427789
rs676996	9:136146077	-	-	-	Phlebitis and thrombophlebitis	-	Phenoscanner	UKBB
rs676996	9:136146077	chr9:136139265	9:136139265	0.87713	phytosterol levels	-	GWAS_catalog	20529992
rs676996	9:136146077	chr9:136149229	9:136149229	0.97891	protein quantitative trait loci	-	GWAS_catalog	18464913
rs676996	9:136146077	-	-	-	Pulmonary embolism	-	Phenoscanner	UKBB
rs676996	9:136146077	rs8176719	9:136132908	0.84854	Red blood cell count	Immunological	GWAS_ATLAS	27863252
rs676996	9:136146077	-	-	-	Red blood cell count	-	Phenoscanner	27863252
rs676996	9:136146077	rs687621	9:136137065	0.98307	Salicylic acid and derivatives	Environmental	GWAS_ATLAS	31015401
rs676996	9:136146077	rs687289	9:136137106	0.98728	SELE - E-Selectin	Cell	GWAS_ATLAS	28240269
rs676996	9:136146077	-	-	-	Self-reported deep venous thrombosis	-	Phenoscanner	UKBB
rs676996	9:136146077	-	-	-	Self-reported high cholesterol	-	Phenoscanner	UKBB
rs676996	9:136146077	-	-	-	Self-reported pulmonary embolism + or - dvt	-	Phenoscanner	UKBB
rs676996	9:136146077	-	-	-	Serous invasive ovarian cancer	-	Phenoscanner	28346442
rs676996	9:136146077	chr9:136139265	9:136139265	0.87713	serum alkaline phosphatase levels	-	GWAS_catalog	24094242
rs676996	9:136146077	chr9:136149229	9:136149229	0.97891	Serum levels of soluble E-selectin with T1D	Immunological	GWAS_ATLAS	19729612
rs676996	9:136146077	chr9:136139265	9:136139265	0.87713	serum thyroid-stimulating hormone levels	-	GWAS_catalog	25436638
rs676996	9:136146077	chr9:136149500	9:136149500	0.97891	thrombosis	-	GWAS_catalog	26908601
rs676996	9:136146077	chr9:136139265	9:136139265	0.87713	thyroid hormone levels	-	GWAS_catalog	23408906
rs676996	9:136146077	rs687621	9:136137065	0.98307	Thyroid stimulating hormone	Endocrine	GWAS_ATLAS	30367059
rs676996	9:136146077	rs687289	9:136137106	0.98728	TIE1 - Tyrosine-protein kinase receptor Tie-1, soluble	Cell	GWAS_ATLAS	28240269
rs676996	9:136146077	chr9:136142203	9:136142203	0.99152	Total cholesterol	-	Phenoscanner	24097068
rs676996	9:136146077	rs687621	9:136137065	0.98307	Total cholesterol	Metabolic	GWAS_ATLAS	29403010
rs676996	9:136146077	-	-	-	Treatment with cholesterol lowering medication	-	Phenoscanner	UKBB
rs676996	9:136146077	-	-	-	Treatment with warfarin	-	Phenoscanner	UKBB
rs676996	9:136146077	rs8176719	9:136132908	0.84854	Trunk-trunk fat ratio	Metabolic	GWAS_ATLAS	30664634
rs676996	9:136146077	rs687621	9:136137065	0.98307	Type 2 Diabetes	Endocrine	GWAS_ATLAS	30054458
rs676996	9:136146077	chr9:136149229	9:136149229	0.97891	type 2 diabetes	-	GWAS_catalog	30297969
rs676996	9:136146077	chr9:136139265	9:136139265	0.87713	urinary metabolites (h-nmr features)	-	GWAS_catalog	24586186
rs676996	9:136146077	-	-	-	Vascular or heart problems diagnosed by doctor: high blood pressure	-	Phenoscanner	UKBB
rs676996	9:136146077	chr9:136149229	9:136149229	0.97891	venous thromboembolism	-	GWAS_catalog	19278955
rs676996	9:136146077	chr9:136142203	9:136142203	0.99152	Venous thromboembolism	-	Phenoscanner	22672568
rs676996	9:136146077	chr9:136146046	9:136146046	1	Venous thrombosis	-	Phenoscanner	22675575
rs676996	9:136146077	chr9:136142203	9:136142203	0.99152	von Willebrand factor vWF	-	Phenoscanner	23381943
rs676996	9:136146077	rs687289	9:136137106	0.98728	VWF - von Willebrand factor	Cell	GWAS_ATLAS	28240269
rs676996	9:136146077	chr9:136149229	9:136149229	0.97891	vwf levels in ischaemic stroke and hyperhomocysteinaemia	-	GWAS_catalog	28495826
rs676996	9:136146077	rs687621	9:136137065	0.98307	Waist-hip ratio	Metabolic	GWAS_ATLAS	30239722
rs676996	9:136146077	rs8176719	9:136132908	0.84854	White blood cell count	Immunological	GWAS_ATLAS	27863252
rs676996	9:136146077	-	-	-	White blood cell count	-	Phenoscanner	27863252
rs3012065	10:126737579	-	-	-	Body Mass Index	Metabolic	GWAS_ATLAS	30239722
rs4910165	11:10674044	rs6484437	11:10667275	0.93997	3rd ventricle	Neurological	GWAS_ATLAS	31676860
rs4910165	11:10674044	rs10840457	11:10675738	0.95375	arterial stiffness index	-	GWAS_catalog	31235810
rs4910165	11:10674044	rs2052690	11:10664033	0.812	asthma	-	GWAS_catalog	30929738
rs4910165	11:10674044	rs2052690	11:10664033	0.812	Asthma	Respiratory	GWAS_ATLAS	30929738
rs4910165	11:10674044	rs2052690	11:10664033	0.812	asthma (childhood onset)	-	GWAS_catalog	30929738
rs4910165	11:10674044	rs4442541	11:10669172	0.96287	brain region volumes	-	GWAS_catalog	31676860
rs4910165	11:10674044	rs2052690	11:10664033	0.812	Diastolic Blood Pressure	Cardiovascular	GWAS_ATLAS	31427789
rs4910165	11:10674044	-	-	-	Diastolic blood pressure	-	Phenoscanner	UKBB
rs4910165	11:10674044	rs6484437	11:10667275	0.93997	Fornix (column and body of fornix) fractional anisotropy	Neurological	GWAS_ATLAS	BioRxiv: https://doi.org/10.1101/288563
rs4910165	11:10674044	rs4909945	11:10673739	0.97672	headache	-	GWAS_catalog	29397368
rs4910165	11:10674044	rs4909945	11:10673739	0.97672	Headache	-	Phenoscanner	29397368
rs4910165	11:10674044	rs7940646	11:10669228	0.95369	Headache	Neurological	GWAS_ATLAS	31427789
rs4910165	11:10674044	rs6484437	11:10667275	0.93997	Left lateral ventricle	Neurological	GWAS_ATLAS	31676860
rs4910165	11:10674044	rs2052690	11:10664033	0.812	Mean platelet volume	Immunological	GWAS_ATLAS	27863252
rs4910165	11:10674044	-	-	-	Mean platelet volume	-	Phenoscanner	27863252
rs4910165	11:10674044	rs7940646	11:10669228	0.95369	Medication for pain relief, constipation, heartburn: ibuprofen	-	Phenoscanner	UKBB
rs4910165	11:10674044	rs4909945	11:10673739	0.97672	migraine	-	GWAS_catalog	23793025
rs4910165	11:10674044	-	-	-	Migraine	-	Phenoscanner	27182965
rs4910165	11:10674044	-	-	-	Pain type experienced in last month: headache	-	Phenoscanner	UKBB
rs4910165	11:10674044	rs7940646	11:10669228	0.95369	platelet aggregation	-	GWAS_catalog	20526338
rs4910165	11:10674044	rs7940646	11:10669228	0.95369	Platelet aggregation in response to ADP 5um10um	-	Phenoscanner	20526338
rs4910165	11:10674044	rs6484437	11:10667275	0.93997	red blood cell count	-	GWAS_catalog	30595370
rs4910165	11:10674044	-	-	-	respiratory diseases	-	GWAS_catalog	30595370
rs4910165	11:10674044	rs6484437	11:10667275	0.93997	Right lateral ventricle	Neurological	GWAS_ATLAS	31676860
rs4910165	11:10674044	rs11042906	11:10665235	0.84699	systolic blood pressure	-	GWAS_catalog	30595370
rs4910165	11:10674044	rs2052691	11:10664421	0.82479	Systolic Blood Pressure	Cardiovascular	GWAS_ATLAS	31427789
rs4910165	11:10674044	-	-	-	Systolic blood pressure	-	Phenoscanner	UKBB
rs4910165	11:10674044	rs6484437	11:10667275	0.93997	white matter microstructure (fractional anisotropy)	-	GWAS_catalog	31666681
rs10838738	11:47663049	rs1317164	11:47419757	0.80578	Age at menarche	Reproduction	GWAS_ATLAS	31427789
rs10838738	11:47663049	rs11604680	11:47457539	0.83849	alcohol consumption (drinks per week)	-	GWAS_catalog	30643258
rs10838738	11:47663049	rs11604680	11:47457539	0.83849	alcohol consumption (drinks per week) (mtag)	-	GWAS_catalog	30643251
rs10838738	11:47663049	rs1317164	11:47419757	0.80578	Alcohol intake	Psychiatric	GWAS_ATLAS	BioRxiv: https://doi.org/10.1101/261081
rs10838738	11:47663049	rs1317164	11:47419757	0.80578	Alcohol intake frequency	Psychiatric	GWAS_ATLAS	31427789
rs10838738	11:47663049	-	-	-	Alcohol intake frequency	-	Phenoscanner	UKBB
rs10838738	11:47663049	-	-	-	Arm fat mass left	-	Phenoscanner	UKBB
rs10838738	11:47663049	-	-	-	Arm fat mass right	-	Phenoscanner	UKBB
rs10838738	11:47663049	-	-	-	Arm fat percentage left	-	Phenoscanner	UKBB
rs10838738	11:47663049	-	-	-	Arm fat percentage right	-	Phenoscanner	UKBB
rs10838738	11:47663049	rs1317164	11:47419757	0.80578	Arm-arm fat ratio	Metabolic	GWAS_ATLAS	30664634
rs10838738	11:47663049	rs12787646	11:47669665	0.95279	bitter beverage consumption	-	GWAS_catalog	31046077
rs10838738	11:47663049	-	-	-	Body fat percentage	-	Phenoscanner	UKBB
rs10838738	11:47663049	-	-	-	Body mass index	-	Phenoscanner	28892062
rs10838738	11:47663049	rs1064608	11:47640429	1	body mass index	-	GWAS_catalog	29273807
rs10838738	11:47663049	rs1317164	11:47419757	0.80578	Body Mass Index	Metabolic	GWAS_ATLAS	31427789
rs10838738	11:47663049	rs1064608	11:47640429	1	Body mass index adjusted for physical activity	-	Phenoscanner	28448500
rs10838738	11:47663049	-	-	-	Body mass index adjusted for smoking	-	Phenoscanner	28443625
rs10838738	11:47663049	-	-	-	Body mass index females	-	Phenoscanner	28892062
rs10838738	11:47663049	-	-	-	Body mass index in females	-	Phenoscanner	25673413
rs10838738	11:47663049	-	-	-	Body mass index in males	-	Phenoscanner	25673413
rs10838738	11:47663049	-	-	-	Body mass index in males greater than 50 years of age	-	Phenoscanner	26426971
rs10838738	11:47663049	rs1064608	11:47640429	1	cognitive performance	-	GWAS_catalog	30038396
rs10838738	11:47663049	rs1317164	11:47419757	0.80578	Comparative body size	Metabolic	GWAS_ATLAS	31427789
rs10838738	11:47663049	-	-	-	Comparative body size at age 10	-	Phenoscanner	UKBB
rs10838738	11:47663049	rs1317164	11:47419757	0.80578	Comparative height size	Skeletal	GWAS_ATLAS	31427789
rs10838738	11:47663049	-	-	-	Comparative height size at age 10	-	Phenoscanner	UKBB
rs10838738	11:47663049	rs34467936	11:47915299	0.85403	depressed affect	-	GWAS_catalog	29942085
rs10838738	11:47663049	rs35184771	11:47475189	0.97413	Depressive affect	Psychiatric	GWAS_ATLAS	29942085
rs10838738	11:47663049	rs2290850	11:47807774	0.93602	depressive symptoms	-	GWAS_catalog	30643256
rs10838738	11:47663049	rs10838704	11:47424717	0.82229	Depressive symptoms	Psychiatric	GWAS_ATLAS	30643256
rs10838738	11:47663049	rs1317164	11:47419757	0.80578	Ease of skin tanning	Dermatological	GWAS_ATLAS	31427789
rs10838738	11:47663049	rs4752999	11:47428565	0.80968	Fasting proinsulin	Metabolic	GWAS_ATLAS	21873549
rs10838738	11:47663049	rs35184771	11:47475189	0.97413	feeling lonely	-	GWAS_catalog	29500382
rs10838738	11:47663049	rs4752801	11:47907641	0.85036	feeling miserable	-	GWAS_catalog	29500382
rs10838738	11:47663049	rs1317164	11:47419757	0.80578	First PC of the four riskly behaviours	Activities	GWAS_ATLAS	BioRxiv: https://doi.org/10.1101/261081
rs10838738	11:47663049	-	-	-	Forced vital capacity	-	Phenoscanner	UKBB
rs10838738	11:47663049	-	-	-	Forced vital capacity, best measure	-	Phenoscanner	UKBB
rs10838738	11:47663049	rs11039355	11:47737501	0.9486	Free thyroxine	Endocrine	GWAS_ATLAS	30367059
rs10838738	11:47663049	rs11039355	11:47737501	0.9486	free thyroxine concentration	-	GWAS_catalog	30367059
rs10838738	11:47663049	-	-	-	Gene expression	-	Phenoscanner	20935630
rs10838738	11:47663049	rs34923397	11:47769564	0.94432	general cognitive ability	-	GWAS_catalog	29844566
rs10838738	11:47663049	rs34467936	11:47915299	0.85403	general factor of neuroticism	-	GWAS_catalog	30867560
rs10838738	11:47663049	rs60956317	11:47825735	0.86143	Granulocyte count	Immunological	GWAS_ATLAS	27863252
rs10838738	11:47663049	rs35184771	11:47475189	0.97413	Granulocyte percentage of myeloid white cells	Immunological	GWAS_ATLAS	27863252
rs10838738	11:47663049	-	-	-	Granulocyte percentage of myeloid white cells	-	Phenoscanner	27863252
rs10838738	11:47663049	-	-	-	Hand grip strength left	-	Phenoscanner	UKBB
rs10838738	11:47663049	-	-	-	HDL cholesterol	-	Phenoscanner	20686565
rs10838738	11:47663049	-	-	-	Height	-	Phenoscanner	25282103
rs10838738	11:47663049	rs34958982	11:47547046	0.98706	height	-	GWAS_catalog	30595370
rs10838738	11:47663049	rs1317164	11:47419757	0.80578	Height	Skeletal	GWAS_ATLAS	31427789
rs10838738	11:47663049	-	-	-	High density lipoprotein	-	Phenoscanner	24097068
rs10838738	11:47663049	rs10838704	11:47424717	0.82229	High-density lipoprotein cholesterol	Metabolic	GWAS_ATLAS	24097068
rs10838738	11:47663049	rs1317164	11:47419757	0.80578	Hip circumference	Metabolic	GWAS_ATLAS	31427789
rs10838738	11:47663049	-	-	-	Hip circumference	-	Phenoscanner	UKBB
rs10838738	11:47663049	rs1317164	11:47419757	0.80578	Impedance measures - Arm fat mass (left)	Metabolic	GWAS_ATLAS	31427789
rs10838738	11:47663049	rs1317164	11:47419757	0.80578	Impedance measures - Arm fat mass (right)	Metabolic	GWAS_ATLAS	31427789
rs10838738	11:47663049	rs1317164	11:47419757	0.80578	Impedance measures - Arm fat percentage (left)	Metabolic	GWAS_ATLAS	31427789
rs10838738	11:47663049	rs1317164	11:47419757	0.80578	Impedance measures - Arm fat percentage (right)	Metabolic	GWAS_ATLAS	31427789
rs10838738	11:47663049	rs1317164	11:47419757	0.80578	Impedance measures - Body fat percentage	Metabolic	GWAS_ATLAS	31427789
rs10838738	11:47663049	rs1317164	11:47419757	0.80578	Impedance measures - Body mass index (BMI)	Metabolic	GWAS_ATLAS	31427789
rs10838738	11:47663049	rs1317164	11:47419757	0.80578	Impedance measures - Leg fat mass (left)	Metabolic	GWAS_ATLAS	31427789
rs10838738	11:47663049	rs1317164	11:47419757	0.80578	Impedance measures - Leg fat mass (right)	Metabolic	GWAS_ATLAS	31427789
rs10838738	11:47663049	rs1317164	11:47419757	0.80578	Impedance measures - Leg fat percentage (left)	Metabolic	GWAS_ATLAS	31427789
rs10838738	11:47663049	rs1317164	11:47419757	0.80578	Impedance measures - Leg fat percentage (right)	Metabolic	GWAS_ATLAS	31427789
rs10838738	11:47663049	rs1317164	11:47419757	0.80578	Impedance measures - Trunk fat mass	Metabolic	GWAS_ATLAS	31427789
rs10838738	11:47663049	rs1317164	11:47419757	0.80578	Impedance measures - Trunk fat percentage	Metabolic	GWAS_ATLAS	31427789
rs10838738	11:47663049	rs3781625	11:47443080	0.81765	Impedance measures - Trunk fat-free mass	Metabolic	GWAS_ATLAS	31427789
rs10838738	11:47663049	rs11600581	11:47448497	0.80145	Impedance measures - Trunk predicted mass	Metabolic	GWAS_ATLAS	31427789
rs10838738	11:47663049	rs1317164	11:47419757	0.80578	Impedance measures - Whole body fat mass	Metabolic	GWAS_ATLAS	31427789
rs10838738	11:47663049	rs11605348	11:47606483	0.94852	insomnia	-	GWAS_catalog	30804565
rs10838738	11:47663049	rs11605348	11:47606483	0.94852	intelligence	-	GWAS_catalog	29942086
rs10838738	11:47663049	rs1317164	11:47419757	0.80578	Intelligence	Cognitive	GWAS_ATLAS	30038396
rs10838738	11:47663049	-	-	-	Leg fat mass left	-	Phenoscanner	UKBB
rs10838738	11:47663049	-	-	-	Leg fat mass right	-	Phenoscanner	UKBB
rs10838738	11:47663049	-	-	-	Leg fat percentage left	-	Phenoscanner	UKBB
rs10838738	11:47663049	-	-	-	Leg fat percentage right	-	Phenoscanner	UKBB
rs10838738	11:47663049	rs2290850	11:47807774	0.93602	life satisfaction	-	GWAS_catalog	30643256
rs10838738	11:47663049	rs35184771	11:47475189	0.97413	Life satisfaction	Activities	GWAS_ATLAS	30643256
rs10838738	11:47663049	-	-	-	log Proinsulin	-	Phenoscanner	21873549
rs10838738	11:47663049	rs35184771	11:47475189	0.97413	Loneliness	Psychiatric	GWAS_ATLAS	31427789
rs10838738	11:47663049	rs11039265	11:47523214	0.96582	loneliness	-	GWAS_catalog	31518406
rs10838738	11:47663049	rs11605348	11:47606483	0.94852	loneliness (mtag)	-	GWAS_catalog	29970889
rs10838738	11:47663049	-	-	-	Loneliness, isolation	-	Phenoscanner	UKBB
rs10838738	11:47663049	rs35184771	11:47475189	0.97413	Miserableness	Psychiatric	GWAS_ATLAS	31427789
rs10838738	11:47663049	-	-	-	Miserableness	-	Phenoscanner	UKBB
rs10838738	11:47663049	rs35184771	11:47475189	0.97413	Monocyte percentage of white cells	Immunological	GWAS_ATLAS	27863252
rs10838738	11:47663049	-	-	-	Monocyte percentage of white cells	-	Phenoscanner	27863252
rs10838738	11:47663049	rs11039389	11:47796062	0.92779	neurociticism	-	GWAS_catalog	29500382
rs10838738	11:47663049	rs11039389	11:47796062	0.92779	neuroticism	-	GWAS_catalog	29942085
rs10838738	11:47663049	rs1317164	11:47419757	0.80578	Neuroticism	Psychiatric	GWAS_ATLAS	30643256
rs10838738	11:47663049	-	-	-	Neuroticism score	-	Phenoscanner	UKBB
rs10838738	11:47663049	rs12787112	11:47687147	0.96136	Neutrophil count	Immunological	GWAS_ATLAS	27863252
rs10838738	11:47663049	rs1317164	11:47419757	0.80578	Platelet count	Immunological	GWAS_ATLAS	27863252
rs10838738	11:47663049	-	-	-	Platelet count	-	Phenoscanner	27863252
rs10838738	11:47663049	rs10838724	11:47527052	0.82203	Plateletcrit	Immunological	GWAS_ATLAS	27863252
rs10838738	11:47663049	rs2290850	11:47807774	0.93602	positive affect	-	GWAS_catalog	30643256
rs10838738	11:47663049	rs1317164	11:47419757	0.80578	Possitive affect	Activities	GWAS_ATLAS	30643256
rs10838738	11:47663049	rs12363232	11:47623890	1	risk-taking tendency (4-domain principal component model)	-	GWAS_catalog	30643258
rs10838738	11:47663049	rs4752845	11:47539697	0.98706	serum metabolite levels	-	GWAS_catalog	31636271
rs10838738	11:47663049	rs4752845	11:47539697	0.98706	serum metabolite levels (cms)	-	GWAS_catalog	31636271
rs10838738	11:47663049	rs1317164	11:47419757	0.80578	Sitting height	Skeletal	GWAS_ATLAS	31427789
rs10838738	11:47663049	-	-	-	Sitting height	-	Phenoscanner	UKBB
rs10838738	11:47663049	rs11039348	11:47728617	0.9486	smoking initiation (ever regular vs never regular) (mtag)	-	GWAS_catalog	30643251
rs10838738	11:47663049	rs7927771	11:47781306	0.94432	subjective well-being	-	GWAS_catalog	27089181
rs10838738	11:47663049	rs1317164	11:47419757	0.80578	Suffer from nerves	Psychiatric	GWAS_ATLAS	31427789
rs10838738	11:47663049	-	-	-	Suffer from nerves	-	Phenoscanner	UKBB
rs10838738	11:47663049	rs12787112	11:47687147	0.96136	suffering from nerves	-	GWAS_catalog	29500382
rs10838738	11:47663049	rs12787112	11:47687147	0.96136	Sum basophil neutrophil count	Immunological	GWAS_ATLAS	27863252
rs10838738	11:47663049	rs12787112	11:47687147	0.96136	Sum neutrophil eosinophil count	Immunological	GWAS_ATLAS	27863252
rs10838738	11:47663049	-	-	-	Trunk fat mass	-	Phenoscanner	UKBB
rs10838738	11:47663049	-	-	-	Trunk fat percentage	-	Phenoscanner	UKBB
rs10838738	11:47663049	-	-	-	Trunk fat-free mass	-	Phenoscanner	UKBB
rs10838738	11:47663049	-	-	-	Trunk predicted mass	-	Phenoscanner	UKBB
rs10838738	11:47663049	rs35184771	11:47475189	0.97413	Usual side of head for mobile phone use	Activities	GWAS_ATLAS	31427789
rs10838738	11:47663049	rs1317164	11:47419757	0.80578	Usual walking pace	Activities	GWAS_ATLAS	31427789
rs10838738	11:47663049	rs35184771	11:47475189	0.97413	Verbal-numerical reasoning	Cognitive	GWAS_ATLAS	29844566
rs10838738	11:47663049	rs1317164	11:47419757	0.80578	Waist circumference	Metabolic	GWAS_ATLAS	31427789
rs10838738	11:47663049	-	-	-	Waist circumference	-	Phenoscanner	UKBB
rs10838738	11:47663049	rs3781625	11:47443080	0.81765	Waist-hip ratio	Metabolic	GWAS_ATLAS	30239722
rs10838738	11:47663049	rs1317164	11:47419757	0.80578	Well-being spectrum	Psychiatric	GWAS_ATLAS	30643256
rs10838738	11:47663049	rs12787646	11:47669665	0.95279	White blood cell count	Immunological	GWAS_ATLAS	27863252
rs10838738	11:47663049	rs12364432	11:47902883	0.92779	white blood cell count	-	GWAS_catalog	30595370
rs10838738	11:47663049	-	-	-	Whole body fat mass	-	Phenoscanner	UKBB
rs10838738	11:47663049	rs4752856	11:47648042	1	worry	-	GWAS_catalog	29942085
rs10838738	11:47663049	rs35184771	11:47475189	0.97413	Worry	Psychiatric	GWAS_ATLAS	29942085
rs2212450	11:112826867	rs2212450	11:112826867	1	Age first had sexual intercourse	Reproduction	GWAS_ATLAS	31427789
rs2212450	11:112826867	rs2212450	11:112826867	1	body mass index	-	GWAS_catalog	30239722
rs2212450	11:112826867	rs2212450	11:112826867	1	Body Mass Index	Metabolic	GWAS_ATLAS	30239722
rs2212450	11:112826867	rs2212450	11:112826867	1	Depressive symptoms	Psychiatric	GWAS_ATLAS	29942085
rs2212450	11:112826867	rs2212450	11:112826867	1	Ever vs never smokers	Psychiatric	GWAS_ATLAS	31427789
rs2212450	11:112826867	rs2212450	11:112826867	1	First PC of the four riskly behaviours	Activities	GWAS_ATLAS	BioRxiv: https://doi.org/10.1101/261081
rs2212450	11:112826867	rs2212450	11:112826867	1	Neuroticism	Psychiatric	GWAS_ATLAS	31427789
rs2212450	11:112826867	rs2212450	11:112826867	1	Number of sexual partners	Reproduction	GWAS_ATLAS	BioRxiv: https://doi.org/10.1101/261081
rs2212450	11:112826867	rs2212450	11:112826867	1	Past tobacco smoking	Psychiatric	GWAS_ATLAS	31427789
rs2212450	11:112826867	rs2212450	11:112826867	1	Tense	Psychiatric	GWAS_ATLAS	31427789
rs2212450	11:112826867	rs2212450	11:112826867	1	Tobacco smoking	Psychiatric	GWAS_ATLAS	31427789
rs2212450	11:112826867	rs2212450	11:112826867	1	Worry	Psychiatric	GWAS_ATLAS	29942085
rs4345978	11:123009751	rs113451750	11:123004938	0.8455	Pulse rate	Cardiovascular	GWAS_ATLAS	31427789
rs4345978	11:123009751	rs12283343	11:123008349	0.96727	Pulse rate	-	Phenoscanner	UKBB
rs4345978	11:123009751	rs113451750	11:123004938	0.8455	Resting heart rate	Cardiovascular	GWAS_ATLAS	30940143
rs4579999	12:24439661	rs10842304	12:24424791	0.80226	FEV1/FVC ratio	Respiratory	GWAS_ATLAS	30804560
rs4579999	12:24439661	rs563110	12:24438591	0.92189	lung function (fev1/fvc)	-	GWAS_catalog	30595370
rs4579999	12:24439661	-	-	-	PEF	Respiratory	GWAS_ATLAS	30804560
rs111235435	12:24757629	rs11047526	12:24759806	0.98359	calcium levels	-	GWAS_catalog	25972035
rs111235435	12:24757629	rs7969321	12:24761558	0.98359	Heart rate variability	Cardiovascular	GWAS_ATLAS	28613276
rs111235435	12:24757629	rs1386639	12:24768847	0.98774	Heart rate variability pvRSAHF	-	Phenoscanner	28613276
rs111235435	12:24757629	rs113807524	12:24757748	0.9918	Height	Skeletal	GWAS_ATLAS	31427789
rs111235435	12:24757629	-	-	-	Pulse rate	Cardiovascular	GWAS_ATLAS	31427789
rs111235435	12:24757629	-	-	-	Pulse rate	-	Phenoscanner	UKBB
rs111235435	12:24757629	rs11047547	12:24797562	0.83222	Resting heart rate	Cardiovascular	GWAS_ATLAS	30940143
rs13632	12:48177238	rs4760742	12:48172058	0.9845	Heel bone mineral density	Skeletal	GWAS_ATLAS	30598549
rs13632	12:48177238	rs4760636	12:48173352	0.97401	urate levels	-	GWAS_catalog	23263486
rs920778	12:54360232	rs2366150	12:54353523	0.93526	Heel bone mineral density	Skeletal	GWAS_ATLAS	30048462
rs920778	12:54360232	rs2002472	12:54355209	0.99062	Impedance measures - Impedance of arm (left)	Metabolic	GWAS_ATLAS	31427789
rs920778	12:54360232	-	-	-	Impedance of arm left	-	Phenoscanner	UKBB
rs920778	12:54360232	rs2366150	12:54353523	0.93526	Waist-hip ratio	Metabolic	GWAS_ATLAS	30239722
rs11176001	12:66409367	-	-	-	fev1	-	GWAS_catalog	30804560
rs11176001	12:66409367	rs74097857	12:66393756	0.97342	FEV2	Respiratory	GWAS_ATLAS	30804560
rs11176001	12:66409367	rs74097857	12:66393756	0.97342	FVC	Respiratory	GWAS_ATLAS	30804560
rs11176001	12:66409367	-	-	-	lung function (fvc)	-	GWAS_catalog	30804560
rs11176001	12:66409367	-	-	-	peak expiratory flow	-	GWAS_catalog	30804560
rs11176001	12:66409367	rs74097857	12:66393756	0.97342	PEF	Respiratory	GWAS_ATLAS	30804560
rs2555004	12:114686645	rs1920568	12:114669732	0.81823	FEV2	Respiratory	GWAS_ATLAS	30804560
rs2555004	12:114686645	rs1920568	12:114669732	0.81823	FVC	Respiratory	GWAS_ATLAS	30804560
rs2555004	12:114686645	rs1270884	12:114685571	0.93807	Prostate cancer	-	Phenoscanner	23535732
rs2555004	12:114686645	rs1270884	12:114685571	0.93807	prostate cancer	-	GWAS_catalog	29892016
rs11635984	15:33012232	rs11633862	15:33008359	0.85053	Benign neoplasm of colon, rectum, anus and anal canal	Neoplasms	GWAS_ATLAS	31427789
rs17293632	15:67442596	rs72743461	15:67441750	1	Adrenergics, inhalants	Environmental	GWAS_ATLAS	31015401
rs17293632	15:67442596	-	-	-	Allergic disease	-	Phenoscanner	29083406
rs17293632	15:67442596	rs72743461	15:67441750	1	allergic disease (asthma, hay fever or eczema)	-	GWAS_catalog	31361310
rs17293632	15:67442596	rs56375023	15:67448363	0.98831	Allergic disease asthma hay fever or eczema	-	Phenoscanner	29083406
rs17293632	15:67442596	-	-	-	allergic rhinitis	-	GWAS_catalog	31361310
rs17293632	15:67442596	-	-	-	Asthma	-	Phenoscanner	29273806
rs17293632	15:67442596	rs72743461	15:67441750	1	asthma	-	GWAS_catalog	31361310
rs17293632	15:67442596	rs72743461	15:67441750	1	Asthma	Respiratory	GWAS_ATLAS	31427789
rs17293632	15:67442596	rs72743461	15:67441750	1	asthma (adult onset)	-	GWAS_catalog	30929738
rs17293632	15:67442596	rs72743461	15:67441750	1	asthma (childhood onset)	-	GWAS_catalog	30929738
rs17293632	15:67442596	rs72743461	15:67441750	1	asthma (moderate or severe)	-	GWAS_catalog	30552067
rs17293632	15:67442596	rs72743461	15:67441750	1	asthma onset (childhood vs adult)	-	GWAS_catalog	30929738
rs17293632	15:67442596	rs56062135	15:67455630	0.98823	asthma or allergic disease (pleiotropy)	-	GWAS_catalog	29785011
rs17293632	15:67442596	rs72743461	15:67441750	1	Asthma, hay fever or eczema	Respiratory	GWAS_ATLAS	29083406
rs17293632	15:67442596	-	-	-	chronic inflammatory diseases (ankylosing spondylitis, crohn's disease, psoriasis, primary sclerosing cholangitis, ulcerative colitis) (pleiotropy)	-	GWAS_catalog	26974007
rs17293632	15:67442596	rs72743461	15:67441750	1	Coronary artery disease	Cardiovascular	GWAS_ATLAS	26343387
rs17293632	15:67442596	-	-	-	Coronary artery disease	-	Phenoscanner	26343387
rs17293632	15:67442596	rs72743461	15:67441750	1	coronary artery disease	-	GWAS_catalog	29212778
rs17293632	15:67442596	rs72743461	15:67441750	1	coronary artery disease (myocardial infarction, percutaneous transluminal coronary angioplasty, coronary artery bypass grafting, angina or chromic ischemic heart disease)	-	GWAS_catalog	28714975
rs17293632	15:67442596	-	-	-	crohn's disease	-	GWAS_catalog	21102463
rs17293632	15:67442596	rs72743461	15:67441750	1	Crohn's Disease	Gastrointestinal	GWAS_ATLAS	28067908
rs17293632	15:67442596	-	-	-	Crohns disease	-	Phenoscanner	21102463
rs17293632	15:67442596	-	-	-	Doctor diagnosed asthma	-	Phenoscanner	UKBB
rs17293632	15:67442596	rs72743461	15:67441750	1	Doctor diagnosed hayfever or allergic rhinitis	Respiratory	GWAS_ATLAS	31427789
rs17293632	15:67442596	rs56375023	15:67448363	0.98831	eczema	-	GWAS_catalog	30595370
rs17293632	15:67442596	rs72743461	15:67441750	1	Eosinophil count	Immunological	GWAS_ATLAS	27863252
rs17293632	15:67442596	-	-	-	Eosinophil count	-	Phenoscanner	27863252
rs17293632	15:67442596	-	-	-	eosinophil counts	-	GWAS_catalog	30595370
rs17293632	15:67442596	rs72743461	15:67441750	1	Eosinophil percentage of granulocytes	Immunological	GWAS_ATLAS	27863252
rs17293632	15:67442596	-	-	-	Eosinophil percentage of granulocytes	-	Phenoscanner	27863252
rs17293632	15:67442596	rs72743461	15:67441750	1	Eosinophil percentage of white cells	Immunological	GWAS_ATLAS	27863252
rs17293632	15:67442596	-	-	-	Eosinophil percentage of white cells	-	Phenoscanner	27863252
rs17293632	15:67442596	rs72743461	15:67441750	1	FEV1/FVC ratio	Respiratory	GWAS_ATLAS	30804560
rs17293632	15:67442596	rs72743461	15:67441750	1	Glucocorticoids	Environmental	GWAS_ATLAS	31015401
rs17293632	15:67442596	-	-	-	hay fever and/or eczema	-	GWAS_catalog	31361310
rs17293632	15:67442596	rs72743461	15:67441750	1	Hayfever, allergic rhinitis or eczema	Respiratory	GWAS_ATLAS	31427789
rs17293632	15:67442596	-	-	-	Hayfever, allergic rhinitis or eczema	-	Phenoscanner	UKBB
rs17293632	15:67442596	rs72743461	15:67441750	1	Hayfever/Allergic Rhinitis	Respiratory	GWAS_ATLAS	31427789
rs17293632	15:67442596	-	-	-	inflammatory bowel disease	-	GWAS_catalog	23128233
rs17293632	15:67442596	-	-	-	Inflammatory bowel disease	-	Phenoscanner	23128233
rs17293632	15:67442596	rs72743461	15:67441750	1	Inflammatory Bowel Disease	Gastrointestinal	GWAS_ATLAS	28067908
rs17293632	15:67442596	rs72743477	15:67464291	0.89579	lung function (fev1/fvc)	-	GWAS_catalog	30595370
rs17293632	15:67442596	rs72743461	15:67441750	1	medication use (adrenergics, inhalants)	-	GWAS_catalog	31015401
rs17293632	15:67442596	rs72743461	15:67441750	1	medication use (glucocorticoids)	-	GWAS_catalog	31015401
rs17293632	15:67442596	rs72743461	15:67441750	1	myocardial infarction	-	GWAS_catalog	26343387
rs17293632	15:67442596	-	-	-	No blood clot, bronchitis, emphysema, asthma, rhinitis, eczema or allergy diagnosed by doctor	-	Phenoscanner	UKBB
rs17293632	15:67442596	rs72743477	15:67464291	0.89579	pediatric autoimmune diseases	-	GWAS_catalog	26301688
rs17293632	15:67442596	rs72743461	15:67441750	1	respiratory diseases	-	GWAS_catalog	30595370
rs17293632	15:67442596	rs17228058	15:67450305	0.98244	Self reported allergy	-	Phenoscanner	23817569
rs17293632	15:67442596	rs17228058	15:67450305	0.98244	self-reported allergy	-	GWAS_catalog	23817569
rs17293632	15:67442596	-	-	-	Self-reported asthma	-	Phenoscanner	UKBB
rs17293632	15:67442596	-	-	-	Self-reported hayfever or allergic rhinitis	-	Phenoscanner	UKBB
rs17293632	15:67442596	rs72743461	15:67441750	1	Sum eosinophil basophil count	Immunological	GWAS_ATLAS	27863252
rs17293632	15:67442596	-	-	-	Sum eosinophil basophil counts	-	Phenoscanner	27863252
rs17293632	15:67442596	rs56062135	15:67455630	0.98823	thyroid cancer	-	GWAS_catalog	28195142
rs17293632	15:67442596	rs56062135	15:67455630	0.98823	Thyroid cancer	-	Phenoscanner	28195142
rs17293632	15:67442596	-	-	-	Treatment with ventolin 100micrograms inhaler	-	Phenoscanner	UKBB
rs17293632	15:67442596	-	-	-	ulcerative colitis	-	GWAS_catalog	26192919
rs17293632	15:67442596	rs72743461	15:67441750	1	Ulcerative colitis	Gastrointestinal	GWAS_ATLAS	28067908
rs17293632	15:67442596	-	-	-	Ulcerative colitis	-	Phenoscanner	28067908
rs17293632	15:67442596	rs72743461	15:67441750	1	Ventolin 100micrograms inhaler	Activities	GWAS_ATLAS	31427789
rs17293632	15:67442596	-	-	-	Wheeze or whistling in the chest in last year	-	Phenoscanner	UKBB
rs17293632	15:67442596	rs72743461	15:67441750	1	Wheeze/whistling	Respiratory	GWAS_ATLAS	31427789
rs12594232	15:68469402	rs8040883	15:68517211	0.87893	Height	Skeletal	GWAS_ATLAS	30124842
rs4843407	16:86629047	rs16941554	16:86622436	0.90796	Height	Skeletal	GWAS_ATLAS	30124842
rs78378222	17:7571752	-	-	-	appendicular lean mass	-	GWAS_catalog	31761296
rs78378222	17:7571752	-	-	-	Arm fat-free mass left	-	Phenoscanner	UKBB
rs78378222	17:7571752	-	-	-	Arm fat-free mass right	-	Phenoscanner	UKBB
rs78378222	17:7571752	-	-	-	Arm predicted mass left	-	Phenoscanner	UKBB
rs78378222	17:7571752	-	-	-	Arm predicted mass right	-	Phenoscanner	UKBB
rs78378222	17:7571752	-	-	-	Basal cell carcinoma	-	Phenoscanner	21946351
rs78378222	17:7571752	-	-	-	basal cell carcinoma	-	GWAS_catalog	27539887
rs78378222	17:7571752	-	-	-	Basal cell carcinoma	Neoplasms	GWAS_ATLAS	31427789
rs78378222	17:7571752	-	-	-	Basal metabolic rate	-	Phenoscanner	UKBB
rs78378222	17:7571752	-	-	-	birth weight	-	GWAS_catalog	31043758
rs78378222	17:7571752	-	-	-	Birth weight	Metabolic	GWAS_ATLAS	31427789
rs78378222	17:7571752	-	-	-	Birth weight	-	Phenoscanner	UKBB
rs78378222	17:7571752	-	-	-	cancer	-	GWAS_catalog	28346444
rs78378222	17:7571752	-	-	-	Cause of death: brain, unspecified	-	Phenoscanner	UKBB
rs78378222	17:7571752	-	-	-	Comparative height size	Skeletal	GWAS_ATLAS	31427789
rs78378222	17:7571752	-	-	-	Comparative height size at age 10	-	Phenoscanner	UKBB
rs78378222	17:7571752	-	-	-	Cutaneous squamous cell carcinoma skin cancer	-	Phenoscanner	21946351
rs78378222	17:7571752	-	-	-	diastolic blood pressure	-	GWAS_catalog	30578418
rs78378222	17:7571752	-	-	-	Diastolic Blood Pressure	Cardiovascular	GWAS_ATLAS	31427789
rs78378222	17:7571752	-	-	-	Diastolic blood pressure	-	Phenoscanner	UKBB
rs78378222	17:7571752	-	-	-	Ever had hysterectomy (womb removed) (female)	Reproduction	GWAS_ATLAS	31427789
rs78378222	17:7571752	-	-	-	fat-free mass	-	GWAS_catalog	30593698
rs78378222	17:7571752	-	-	-	Forced expiratory volume in 1-second	-	Phenoscanner	UKBB
rs78378222	17:7571752	-	-	-	Forced expiratory volume in 1-second, best measure	-	Phenoscanner	UKBB
rs78378222	17:7571752	-	-	-	Forced vital capacity	-	Phenoscanner	UKBB
rs78378222	17:7571752	-	-	-	Forced vital capacity, best measure	-	Phenoscanner	UKBB
rs78378222	17:7571752	-	-	-	Glioblastoma	-	Phenoscanner	28346443
rs78378222	17:7571752	-	-	-	glioblastoma	-	GWAS_catalog	29743610
rs78378222	17:7571752	-	-	-	glioblastoma (age-stratified)	-	GWAS_catalog	30152087
rs78378222	17:7571752	-	-	-	Glioma	-	Phenoscanner	28346443
rs78378222	17:7571752	-	-	-	glioma	-	GWAS_catalog	29743610
rs78378222	17:7571752	-	-	-	Height	Skeletal	GWAS_ATLAS	31427789
rs78378222	17:7571752	-	-	-	Height	-	Phenoscanner	UKBB
rs78378222	17:7571752	-	-	-	Hip circumference	Metabolic	GWAS_ATLAS	31427789
rs78378222	17:7571752	-	-	-	Hip circumference	-	Phenoscanner	UKBB
rs78378222	17:7571752	-	-	-	Impedance measures - Arm fat-free mass (left)	Metabolic	GWAS_ATLAS	31427789
rs78378222	17:7571752	-	-	-	Impedance measures - Arm fat-free mass (right)	Metabolic	GWAS_ATLAS	31427789
rs78378222	17:7571752	-	-	-	Impedance measures - Arm predicted mass (left)	Metabolic	GWAS_ATLAS	31427789
rs78378222	17:7571752	-	-	-	Impedance measures - Arm predicted mass (right)	Metabolic	GWAS_ATLAS	31427789
rs78378222	17:7571752	-	-	-	Impedance measures - Basal metabolic rate	Metabolic	GWAS_ATLAS	31427789
rs78378222	17:7571752	-	-	-	Impedance measures - Impedance of arm (left)	Metabolic	GWAS_ATLAS	31427789
rs78378222	17:7571752	-	-	-	Impedance measures - Impedance of arm (right)	Metabolic	GWAS_ATLAS	31427789
rs78378222	17:7571752	-	-	-	Impedance measures - Impedance of leg (left)	Metabolic	GWAS_ATLAS	31427789
rs78378222	17:7571752	-	-	-	Impedance measures - Impedance of leg (right)	Metabolic	GWAS_ATLAS	31427789
rs78378222	17:7571752	-	-	-	Impedance measures - Impedance of whole body	Metabolic	GWAS_ATLAS	31427789
rs78378222	17:7571752	-	-	-	Impedance measures - Leg fat-free mass (left)	Metabolic	GWAS_ATLAS	31427789
rs78378222	17:7571752	-	-	-	Impedance measures - Leg fat-free mass (right)	Metabolic	GWAS_ATLAS	31427789
rs78378222	17:7571752	-	-	-	Impedance measures - Leg predicted mass (left)	Metabolic	GWAS_ATLAS	31427789
rs78378222	17:7571752	-	-	-	Impedance measures - Leg predicted mass (right)	Metabolic	GWAS_ATLAS	31427789
rs78378222	17:7571752	-	-	-	Impedance measures - Trunk fat-free mass	Metabolic	GWAS_ATLAS	31427789
rs78378222	17:7571752	-	-	-	Impedance measures - Trunk predicted mass	Metabolic	GWAS_ATLAS	31427789
rs78378222	17:7571752	-	-	-	Impedance measures - Weight	Metabolic	GWAS_ATLAS	31427789
rs78378222	17:7571752	-	-	-	Impedance measures - Whole body fat-free mass	Metabolic	GWAS_ATLAS	31427789
rs78378222	17:7571752	-	-	-	Impedance measures - Whole body water mass	Metabolic	GWAS_ATLAS	31427789
rs78378222	17:7571752	-	-	-	Impedance of arm left	-	Phenoscanner	UKBB
rs78378222	17:7571752	-	-	-	Impedance of arm right	-	Phenoscanner	UKBB
rs78378222	17:7571752	-	-	-	Impedance of leg left	-	Phenoscanner	UKBB
rs78378222	17:7571752	-	-	-	Impedance of leg right	-	Phenoscanner	UKBB
rs78378222	17:7571752	-	-	-	Impedance of whole body	-	Phenoscanner	UKBB
rs78378222	17:7571752	-	-	-	keratinocyte cancer (mtag)	-	GWAS_catalog	31174203
rs78378222	17:7571752	-	-	-	Leg fat-free mass left	-	Phenoscanner	UKBB
rs78378222	17:7571752	-	-	-	Leg fat-free mass right	-	Phenoscanner	UKBB
rs78378222	17:7571752	-	-	-	Leg predicted mass left	-	Phenoscanner	UKBB
rs78378222	17:7571752	-	-	-	Leg predicted mass right	-	Phenoscanner	UKBB
rs78378222	17:7571752	-	-	-	Leiomyoma of uterus	-	Phenoscanner	UKBB
rs78378222	17:7571752	-	-	-	Mean corpuscular hemoglobin	Immunological	GWAS_ATLAS	27863252
rs78378222	17:7571752	-	-	-	Mean corpuscular hemoglobin	-	Phenoscanner	27863252
rs78378222	17:7571752	-	-	-	mean corpuscular hemoglobin	-	GWAS_catalog	30595370
rs78378222	17:7571752	-	-	-	Mean corpuscular volume	Immunological	GWAS_ATLAS	27863252
rs78378222	17:7571752	-	-	-	Mean corpuscular volume	-	Phenoscanner	27863252
rs78378222	17:7571752	-	-	-	mosaic loss of chromosome y (y chromosome dosage)	-	GWAS_catalog	28346444
rs78378222	17:7571752	-	-	-	Non glioblastoma glioma	-	Phenoscanner	28346443
rs78378222	17:7571752	-	-	-	non-glioblastoma glioma	-	GWAS_catalog	29743610
rs78378222	17:7571752	-	-	-	non-melanoma skin cancer	-	GWAS_catalog	29739929
rs78378222	17:7571752	-	-	-	Number of operations	-	Phenoscanner	UKBB
rs78378222	17:7571752	-	-	-	Other and unspecified malignant neoplasm of skin	Neoplasms	GWAS_ATLAS	31427789
rs78378222	17:7571752	-	-	-	Other malignant neoplasms of skin	-	Phenoscanner	UKBB
rs78378222	17:7571752	-	-	-	Pulse pressure	-	Phenoscanner	28135244
rs78378222	17:7571752	-	-	-	pulse pressure	-	GWAS_catalog	30578418
rs78378222	17:7571752	-	-	-	red blood cell count	-	GWAS_catalog	30595370
rs78378222	17:7571752	-	-	-	Sitting height	Skeletal	GWAS_ATLAS	31427789
rs78378222	17:7571752	-	-	-	Sitting height	-	Phenoscanner	UKBB
rs78378222	17:7571752	-	-	-	Trunk fat-free mass	-	Phenoscanner	UKBB
rs78378222	17:7571752	-	-	-	Trunk predicted mass	-	Phenoscanner	UKBB
rs78378222	17:7571752	-	-	-	uterine fibroids	-	GWAS_catalog	31649266
rs78378222	17:7571752	-	-	-	uterine fibroids and heavy menstrual bleeding	-	GWAS_catalog	31649266
rs78378222	17:7571752	-	-	-	Weight	Metabolic	GWAS_ATLAS	31427789
rs78378222	17:7571752	-	-	-	Weight	-	Phenoscanner	UKBB
rs78378222	17:7571752	-	-	-	white blood cell count	-	GWAS_catalog	30595370
rs78378222	17:7571752	-	-	-	Whole body fat-free mass	-	Phenoscanner	UKBB
rs78378222	17:7571752	-	-	-	Whole body water mass	-	Phenoscanner	UKBB
rs78378222	17:7571752	-	-	-	Years since last cervical smear test	Activities	GWAS_ATLAS	31427789
rs854786	17:18036283	-	-	-	Waist-hip ratio	Metabolic	GWAS_ATLAS	30239722
rs2525570	17:29681245	rs2854334	17:29715500	0.94669	alcohol consumption (drinks per week)	-	GWAS_catalog	30643251
rs2525570	17:29681245	rs2525565	17:29666588	0.9347	alcohol consumption (drinks per week) (mtag)	-	GWAS_catalog	30643251
rs2525570	17:29681245	-	-	-	Alcohol intake frequency	Psychiatric	GWAS_ATLAS	31427789
rs2525570	17:29681245	-	-	-	Arm fat-free mass left	-	Phenoscanner	UKBB
rs2525570	17:29681245	-	-	-	Arm fat-free mass right	-	Phenoscanner	UKBB
rs2525570	17:29681245	-	-	-	Arm predicted mass left	-	Phenoscanner	UKBB
rs2525570	17:29681245	-	-	-	Arm predicted mass right	-	Phenoscanner	UKBB
rs2525570	17:29681245	-	-	-	Basal metabolic rate	-	Phenoscanner	UKBB
rs2525570	17:29681245	rs12943365	17:29680526	0.92698	bitter alcoholic beverage consumption	-	GWAS_catalog	31046077
rs2525570	17:29681245	rs2040792	17:29628549	0.93842	Comparative height size	Skeletal	GWAS_ATLAS	31427789
rs2525570	17:29681245	-	-	-	Comparative height size at age 10	-	Phenoscanner	UKBB
rs2525570	17:29681245	rs2040792	17:29628549	0.93842	Height	Skeletal	GWAS_ATLAS	31427789
rs2525570	17:29681245	-	-	-	Height	-	Phenoscanner	UKBB
rs2525570	17:29681245	rs2040792	17:29628549	0.93842	Hip circumference	Metabolic	GWAS_ATLAS	31427789
rs2525570	17:29681245	-	-	-	Hip circumference	-	Phenoscanner	UKBB
rs2525570	17:29681245	rs2040792	17:29628549	0.93842	Impedance measures - Arm fat-free mass (left)	Metabolic	GWAS_ATLAS	31427789
rs2525570	17:29681245	rs2040792	17:29628549	0.93842	Impedance measures - Arm fat-free mass (right)	Metabolic	GWAS_ATLAS	31427789
rs2525570	17:29681245	rs2040792	17:29628549	0.93842	Impedance measures - Arm predicted mass (left)	Metabolic	GWAS_ATLAS	31427789
rs2525570	17:29681245	rs2040792	17:29628549	0.93842	Impedance measures - Arm predicted mass (right)	Metabolic	GWAS_ATLAS	31427789
rs2525570	17:29681245	rs2040792	17:29628549	0.93842	Impedance measures - Basal metabolic rate	Metabolic	GWAS_ATLAS	31427789
rs2525570	17:29681245	rs4368212	17:29639263	0.93853	Impedance measures - Impedance of arm (right)	Metabolic	GWAS_ATLAS	31427789
rs2525570	17:29681245	rs2040792	17:29628549	0.93842	Impedance measures - Leg fat-free mass (left)	Metabolic	GWAS_ATLAS	31427789
rs2525570	17:29681245	rs2040792	17:29628549	0.93842	Impedance measures - Leg fat-free mass (right)	Metabolic	GWAS_ATLAS	31427789
rs2525570	17:29681245	rs2040792	17:29628549	0.93842	Impedance measures - Leg predicted mass (left)	Metabolic	GWAS_ATLAS	31427789
rs2525570	17:29681245	rs2040792	17:29628549	0.93842	Impedance measures - Leg predicted mass (right)	Metabolic	GWAS_ATLAS	31427789
rs2525570	17:29681245	rs2040792	17:29628549	0.93842	Impedance measures - Trunk fat-free mass	Metabolic	GWAS_ATLAS	31427789
rs2525570	17:29681245	rs2040792	17:29628549	0.93842	Impedance measures - Trunk predicted mass	Metabolic	GWAS_ATLAS	31427789
rs2525570	17:29681245	rs2040792	17:29628549	0.93842	Impedance measures - Weight	Metabolic	GWAS_ATLAS	31427789
rs2525570	17:29681245	rs2040792	17:29628549	0.93842	Impedance measures - Whole body fat-free mass	Metabolic	GWAS_ATLAS	31427789
rs2525570	17:29681245	rs2040792	17:29628549	0.93842	Impedance measures - Whole body water mass	Metabolic	GWAS_ATLAS	31427789
rs2525570	17:29681245	-	-	-	Impedance of arm right	-	Phenoscanner	UKBB
rs2525570	17:29681245	-	-	-	Leg fat-free mass left	-	Phenoscanner	UKBB
rs2525570	17:29681245	-	-	-	Leg fat-free mass right	-	Phenoscanner	UKBB
rs2525570	17:29681245	-	-	-	Leg predicted mass left	-	Phenoscanner	UKBB
rs2525570	17:29681245	-	-	-	Leg predicted mass right	-	Phenoscanner	UKBB
rs2525570	17:29681245	-	-	-	Trunk fat-free mass	-	Phenoscanner	UKBB
rs2525570	17:29681245	-	-	-	Trunk predicted mass	-	Phenoscanner	UKBB
rs2525570	17:29681245	rs2040792	17:29628549	0.93842	Weight	Metabolic	GWAS_ATLAS	31427789
rs2525570	17:29681245	-	-	-	Weight	-	Phenoscanner	UKBB
rs2525570	17:29681245	-	-	-	Whole body fat-free mass	-	Phenoscanner	UKBB
rs2525570	17:29681245	-	-	-	Whole body water mass	-	Phenoscanner	UKBB
rs4423457	17:64284000	rs72843895	17:64331156	0.83008	height	-	GWAS_catalog	30595370
rs4423457	17:64284000	rs56152251	17:64280153	0.93318	Height	Skeletal	GWAS_ATLAS	31427789
rs4423457	17:64284000	-	-	-	Height	-	Phenoscanner	UKBB
rs4423457	17:64284000	rs56152251	17:64280153	0.93318	Impedance measures - Trunk fat-free mass	Metabolic	GWAS_ATLAS	31427789
rs4423457	17:64284000	rs67700546	17:64301081	0.86769	Impedance measures - Trunk predicted mass	Metabolic	GWAS_ATLAS	31427789
rs4423457	17:64284000	rs56152251	17:64280153	0.93318	qt interval	-	GWAS_catalog	29213071
rs4423457	17:64284000	rs56152251	17:64280153	0.93318	QT interval	-	Phenoscanner	29213071
rs4423457	17:64284000	rs56152251	17:64280153	0.93318	Sitting height	Skeletal	GWAS_ATLAS	31427789
rs4423457	17:64284000	-	-	-	Sitting height	-	Phenoscanner	UKBB
rs2421206	19:11262477	-	-	-	Comparative height size at age 10	-	Phenoscanner	UKBB
rs2421206	19:11262477	-	-	-	Free cholesterol in large LDL	Metabolic	GWAS_ATLAS	27005778
rs2421206	19:11262477	-	-	-	Height	-	Phenoscanner	UKBB
rs2421206	19:11262477	-	-	-	Low-density lipoprotein cholesterol	Metabolic	GWAS_ATLAS	31217584
rs2421206	19:11262477	-	-	-	Phospholipids in medium LDL	Metabolic	GWAS_ATLAS	27005778
rs2421206	19:11262477	-	-	-	Resting heart rate	Cardiovascular	GWAS_ATLAS	30940143
rs2421206	19:11262477	-	-	-	Self-reported high cholesterol	-	Phenoscanner	UKBB
rs2421206	19:11262477	-	-	-	Sitting height	-	Phenoscanner	UKBB
rs2421206	19:11262477	-	-	-	Total cholesterol in LDL	Metabolic	GWAS_ATLAS	27005778
rs2421206	19:11262477	-	-	-	Total cholesterol in medium LDL	Metabolic	GWAS_ATLAS	27005778
rs2421206	19:11262477	-	-	-	Treatment with atorvastatin	-	Phenoscanner	UKBB
rs8106090	19:44371210	rs375066	19:44423570	0.92325	breast cancer	-	GWAS_catalog	29059683
rs8106090	19:44371210	rs4802201	19:44358042	0.8511	Granulocyte percentage of myeloid white cells	Immunological	GWAS_ATLAS	27863252
rs8106090	19:44371210	-	-	-	Granulocyte percentage of myeloid white cells	-	Phenoscanner	27863252
rs8106090	19:44371210	rs4802201	19:44358042	0.8511	Monocyte count	Immunological	GWAS_ATLAS	27863252
rs8106090	19:44371210	-	-	-	Monocyte count	-	Phenoscanner	27863252
rs8106090	19:44371210	rs4802201	19:44358042	0.8511	Monocyte percentage of white cells	Immunological	GWAS_ATLAS	27863252
rs8106090	19:44371210	-	-	-	Monocyte percentage of white cells	-	Phenoscanner	27863252
rs34161672	20:56020599	-	-	-	Mean platelet volume	Immunological	GWAS_ATLAS	27863252
rs34161672	20:56020599	-	-	-	Mean platelet volume	-	Phenoscanner	27863252
rs35384758	20:58998651	-	-	-	Haemorrhoids	-	Phenoscanner	UKBB
rs174767	22:29740728	rs3788411	22:29728783	0.98694	Immature fraction of reticulocytes	Immunological	GWAS_ATLAS	27863252
rs174767	22:29740728	-	-	-	Immature fraction of reticulocytes	-	Phenoscanner	27863252
rs174767	22:29740728	rs4820804	22:29669693	0.89233	Mean platelet volume	Immunological	GWAS_ATLAS	27863252
rs174767	22:29740728	-	-	-	Mean platelet volume	-	Phenoscanner	27863252
rs35318931	X:38009121	-	-	-	Height	-	Phenoscanner	28146470
rs35318931	X:38009121	-	-	-	Nonsyndromic striae distensae stretch marks	-	Phenoscanner	23633020
						-
