# Supplementary material for: Genome-wide analysis of 944 133 individuals provides insights into the etiology of haemorrhoidal disease
Source: HighWire-hosted journal article supplement (doi:10.1136/gutjnl-2020-323868), 2021-04-22
Supplement: gutjnl-2020-323868supp005_data_supplement.xlsx [file gutjnl-2020-323868supp005_data_supplement.xlsx]

## Sheet: Supplementary Table 5
Online Supplementary Table S5: Results of subset-based pleiotropy meta-analysis (SBM).
Lead SNP (rsID)	CHR	BP	start-end	Phenotype(s)	P	Phenotypes(s) subset1	P subset1	OR (95%CI) subset1	Phenotypes(s) subset2	P subset2	OR (95%CI) subset2
rs11580446	1	95241697	95203992-95309134	IBS,HEM	7.2e-13	IBS	0.01368	1.05 (1.01-1.08)	HEM	1.6e-12	0.97 (0.96-0.98)
rs145163454	1	169090748	169081792-169521553	HEM,DIV	1.6e-28	HEM,DIV	1.6e-28	1.01 (1.01-1.01)	na	1.00000	NA (NA-NA)
rs4951080	1	204533284	204449952-204599461	HEM,IBS	3.1e-08	na	1.00000	NA (NA-NA)	HEM,IBS	3.1e-08	0.98 (0.97-0.98)
rs61823192	1	219294570	219268532-219704939	HEM,DIV,IBS	1.4e-12	HEM	0.91549	1 (0.96-1.05)	DIV,IBS	4.8e-14	0.99 (0.98-0.99)
rs79059272	2	67922634	67874054-67954046	HEM,DIV	8.2e-09	HEM,DIV	8.2e-09	1 (1-1)	na	1.00000	NA (NA-NA)
rs6747171	2	145819888	145756260-145904907	IBS,HEM,DIV	1.2e-08	IBS	0.06787	1.03 (1-1.06)	HEM,DIV	7.9e-09	1 (1-1)
rs12987602	2	160960788	160899369-161340963	DIV,HEM,IBS	5.2e-12	DIV	0.01576	1 (1-1)	HEM,IBS	1.1e-11	0.98 (0.97-0.98)
rs13017210	2	174008623	173943763-174107004	HEM,DIV	7.4e-11	HEM	7.9e-10	1.03 (1.02-1.03)	DIV	0.00340	1 (1-1)
rs4853718	2	191404964	191259714-191478211	HEM,IBS	1.4e-08	HEM	1.2e-07	1.03 (1.02-1.03)	IBS	0.00534	0.95 (0.92-0.99)
rs3731912	2	220406722	220399638-220436704	HEM,IBS	1.1e-08	HEM	1.3e-07	1.03 (1.02-1.03)	IBS	0.00366	0.95 (0.92-0.98)
rs2597301	3	70909494	70836756-71047711	HEM,IBS	4.6e-14	HEM	1.3e-13	1.03 (1.02-1.04)	IBS	0.01050	0.96 (0.93-0.99)
rs9876268	3	151064376	150800402-151130197	IBS,DIV	2.2e-12	IBS	0.00017	1.08 (1.04-1.12)	DIV	4.1e-10	1 (0.99-1)
rs3851366	3	160191374	160004026-160309529	HEM,DIV	5.7e-10	HEM	6.1e-10	1.02 (1.02-1.03)	DIV	0.03679	1 (1-1)
rs11942410	4	75656079	75656079-75686640	DIV,IBS,HEM	1.8e-12	DIV,IBS	5.3e-06	1 (1-1)	HEM	1.0e-08	0.97 (0.96-0.98)
rs9307546	4	125672407	125669671-125751084	DIV,HEM	3.4e-08	DIV	0.00093	1 (1-1)	HEM	1.7e-06	0.98 (0.97-0.99)
rs17824374	4	126924999	126893588-127030561	HEM,IBS,DIV	4.5e-10	HEM,IBS	1.8e-11	1.03 (1.02-1.04)	DIV	0.95425	1 (1-1)
rs1542726	4	145515769	145227879-145868370	HEM,DIV	1.0e-12	HEM	1.5e-12	1.03 (1.02-1.04)	DIV	0.02179	1 (1-1)
rs10471645	5	64295363	64128671-64330833	DIV,HEM	3.0e-11	DIV	6.4e-11	1 (1-1.01)	HEM	0.01656	0.99 (0.98-1)
rs13174700	5	93554644	92948485-93571190	IBS,HEM	1.7e-08	IBS	0.04059	1.05 (1-1.09)	HEM	1.9e-08	0.97 (0.95-0.98)
rs12654883	5	97656313	97652398-97700050	HEM,IBS	2.6e-08	HEM,IBS	2.6e-08	1.02 (1.02-1.03)	na	1.00000	NA (NA-NA)
rs965821	5	122137708	122073550-122374459	IBS,DIV	1.2e-08	IBS	0.00133	1.05 (1.02-1.08)	DIV	3.9e-07	1 (1-1)
rs971569	5	164690314	164487955-164786699	HEM,IBS	4.2e-09	HEM	3.7e-09	1.03 (1.02-1.04)	IBS	0.04850	0.96 (0.93-1)
rs7755093	6	17387077	17386607-17479588	HEM,IBS	1.3e-11	na	1.00000	NA (NA-NA)	HEM,IBS	1.3e-11	0.96 (0.96-0.98)
rs6934679	6	127761588	127664661-127777516	HEM,DIV	1.6e-08	HEM,DIV	1.6e-08	1 (1-1)	na	1.00000	NA (NA-NA)
rs2327429	6	134209837	134150561-134214525	HEM,IBS	9.8e-09	HEM,IBS	9.8e-09	1.03 (1.02-1.03)	na	1.00000	NA (NA-NA)
rs3253	6	169616112	169572602-169618454	HEM,DIV	1.5e-11	HEM,DIV	1.5e-11	1 (1-1)	na	1.00000	NA (NA-NA)
rs4556017	7	100632790	100528223-100753880	DIV,IBS,HEM	3.9e-24	DIV,IBS	0.00065	1 (1-1)	HEM	1.0e-22	0.94 (0.93-0.96)
rs12672683	7	113998486	113970468-114004121	HEM,IBS,DIV	7.0e-09	HEM,IBS	1.8e-07	1.02 (1.01-1.03)	DIV	0.00168	1 (1-1)
rs3735894	8	22454826	22447426-22542962	IBS,HEM,DIV	3.3e-11	IBS	0.00121	1.05 (1.02-1.08)	HEM,DIV	9.7e-10	1 (1-1)
rs13252808	8	71616655	71042430-72277688	DIV,HEM,IBS	1.7e-39	DIV	0.00455	1 (1-1)	HEM,IBS	4.1e-39	0.95 (0.94-0.96)
rs2293889	8	116599199	116464988-116639474	HEM,IBS,DIV	1.4e-08	HEM,IBS	0.00276	1.01 (1-1.02)	DIV	2.3e-07	1 (1-1)
rs1333047	9	22124504	21995044-22125503	HEM,IBS	4.7e-28	HEM,IBS	4.7e-28	1.04 (1.03-1.05)	na	1.00000	NA (NA-NA)
rs12421446	11	1612992	1492445-1645885	HEM,DIV	4.5e-08	HEM	4.7e-05	1.02 (1.01-1.03)	DIV	4.6e-05	1 (1-1)
rs4910165	11	10674044	10655021-10701556	HEM,DIV	1.8e-17	HEM	3.2e-16	1.03 (1.03-1.04)	DIV	0.00134	1 (1-1)
rs2077561	11	69992199	69971277-70040925	DIV,HEM	2.1e-11	DIV	2.5e-08	1 (1-1)	HEM	2.9e-05	0.98 (0.97-0.99)
rs4937872	11	112827715	112826867-112912811	IBS,HEM	1.9e-10	IBS	0.02136	1.03 (1-1.07)	HEM	3.3e-10	0.97 (0.97-0.98)
rs12594232	15	68469402	68324830-68567752	HEM,DIV	8.7e-10	HEM	1.7e-09	1.02 (1.02-1.03)	DIV	0.02061	1 (1-1)
rs12441130	15	74234902	74220599-74243246	DIV,IBS,HEM	4.8e-10	DIV,IBS	1.6e-06	1 (1-1)	HEM	1.2e-05	0.98 (0.98-0.99)
rs112991346	16	19967668	19707417-19980931	HEM,DIV	6.1e-09	HEM	9.1e-07	1.03 (1.02-1.04)	DIV	0.00029	1 (1-1)
rs62061554	17	12401309	12394980-12410649	HEM,IBS	1.6e-09	HEM,IBS	1.6e-09	1.04 (1.03-1.05)	na	1.00000	NA (NA-NA)
rs2525570	17	29681245	29400158-29735829	IBS,HEM,DIV	1.9e-10	IBS	0.62685	1.01 (0.98-1.04)	HEM,DIV	1.1e-11	1 (1-1)
rs61043970	18	52881622	52863279-52921673	IBS,DIV	3.0e-08	IBS	7.0e-05	1.06 (1.03-1.1)	DIV	2.0e-05	1 (1-1)
rs113783450	19	11271714	11262477-11277074	HEM,IBS	2.9e-13	HEM,IBS	2.9e-13	1.03 (1.02-1.04)	na	1.00000	NA (NA-NA)
rs2205558	21	29484711	29482552-29513936	IBS,HEM,DIV	3.8e-08	IBS	0.64411	1.01 (0.98-1.04)	HEM,DIV	2.8e-09	1 (1-1)
