# Supplementary material for: Genome-wide analysis of 944 133 individuals provides insights into the etiology of haemorrhoidal disease
Source: HighWire-hosted journal article supplement (doi:10.1136/gutjnl-2020-323868), 2021-04-22
Supplement: gutjnl-2020-323868supp012_data_supplement.xlsx [file gutjnl-2020-323868supp012_data_supplement.xlsx]

## Sheet: Sheet1
Online Supplementary Table S12: List of antibodies used in the immunohistochemistry analyses shown in figure 6 and online supplementary figure S13.
Antibody Name	Dilution	Species	Vendor	Order Number/ID	Lot
EGFR	1/200	rabbit	Abcam	ab52894	GR3214138-6
SMAD3	1/200	rabbit	Abcam	Ab40854	GR3190602-17
CLMP	1/200	rabbit	Sigma-Aldrich	HPA002385	A35819
ABO	1/200	rabbit	Thermoscientif.	PA5-37352	TB2515446
SRPX	1/200	rabbit	Abcam	ab206836	GR241480-6
MUC12	1/200	rabbit	Sigma-Aldrich	HPA023835	3770
ANO1	1/200	rabbit	Abcam	Ab53212	GR3295356-1
NF1	1/200	rabbit	Abcam	ab128054	GR86480-17
ISL1	1/200	rabbit	Abcam	ab109517	GR290344-19
GMDS	1/200	mouse	Abcam	Ab128046	GR3334809-1
MYH11	1/200	mouse	Abcam	ab683	GR3317192-1
COL5A2	1/200	rabbit	Thermoscientif.	PA5-14245	SI2433685
GSDMC	1/200	rabbit	Thermoscientif.	PA5-101660	VJ3103602
SRRT	1/200	rabbit	Thermoscientif.	PA5-60148	R39260
ACHE	1/1000	rabbit	Abcam	ab97299	GR3348808-3
NEGR1	1/1000	rabbit	Sigma-Aldrich	HPA011894	3858
MRVI1	1/200	rabbit	Sigma-Aldrich	HPA008704	R02254
ELN	1/200	rabbit	Abcam	ab21610	GR3896-12
PGP9.5	1/500	rabbit	Ultraclone	RA95101	J1412
PGP9.5	1/500	mouse	OriGene	UM870136	F001
a-SMA	1/1000	rabbit	Abcam	Ab5694	825197
a-SMA	1/1000	mouse	Dako	M0851 clone 1a4	32
Alexafluor 555 Donkey-anti-rabbit	1/700	Donkey	Thermoscientif.	A31572	1454443
Alexafluor 488 Donkey anti-mouse	1/700	Donkey	Thermoscientif.	A21202	1305303
Alexafluor 488 Goat anti-rabbit	1/700	goat	Thermoscientif.	A31628	899848
Alexafluor 555 Donkey anti-mouse	1/700	Donkey	Thermoscientif.	A31570	1048568
