# Supplementary figures and images for: Genome-wide analysis of 944 133 individuals provides insights into the etiology of haemorrhoidal disease
Source: PubMed Central journal article supplement — Gut. 2021 Apr 22;70(8):1538–49. doi: 10.1136/gutjnl-2020-323868 (PMC8292596; doi:10.1136/gutjnl-2020-323868), 2021-04-22

## Visual Abstract

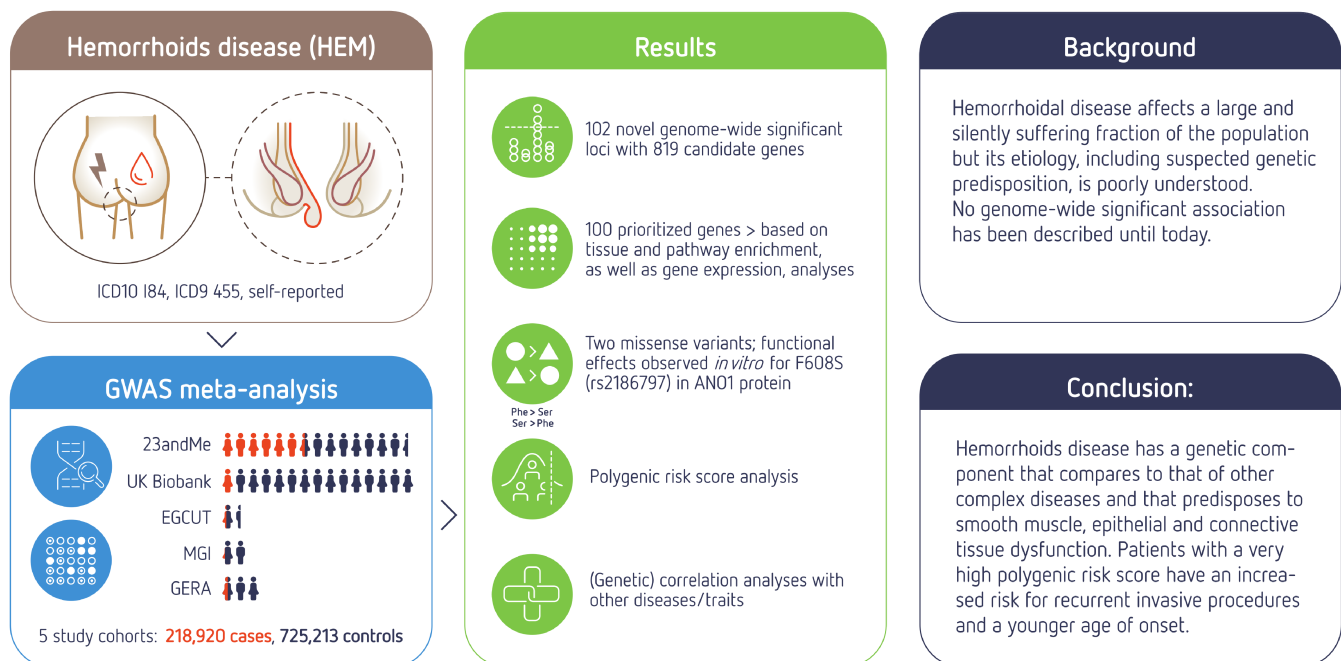

Supplement: gutjnl-2020-323868supp014.pdf [file gutjnl-2020-323868supp014.pdf]
